1                   **GRAS-1 is a conserved novel regulator of early meiotic chromosome**  
2                   **dynamics in *C. elegans***

3  
4  
5           Marina Martinez-Garcia<sup>1</sup>, Pedro Robles Naharro<sup>1</sup>, Marnie W. Skinner<sup>2,3</sup>, Kerstin A.  
6           Baran<sup>2</sup>, Saravanapriah Nadarajan<sup>1</sup>, Nara Shin<sup>1</sup>, Carlos G. Silva-García<sup>4</sup>, Takamune T.  
7           Saito<sup>1,\*</sup>, Sara Beese-Sims<sup>1</sup>, Ana Castaner<sup>1</sup>, Sarai Pacheco<sup>5</sup>, Enrique Martinez-Perez<sup>5</sup>,  
8                                   Philip W. Jordan<sup>2,3</sup> & Monica P. Colaiácovo<sup>1</sup>.

9  
10  
11   <sup>1</sup>*Department of Genetics, Blavatnik Institute, Harvard Medical School, Boston, MA,*  
12   *USA.*

13   <sup>2</sup>*Biochemistry and Molecular Biology Department, Johns Hopkins University, Bloomberg*  
14   *School of Public Health, Baltimore, MD, USA.*

15   <sup>3</sup>*Department of Biochemistry and Molecular Biology, Uniformed Services University of*  
16   *the Health Sciences, Bethesda, MD, USA.*

17   <sup>4</sup>*Department of Molecular Metabolism, Harvard T. H. Chan School of Public Health,*  
18   *Harvard University, Boston, MA, USA.*

19   <sup>5</sup>*MRC London Institute of Medical Sciences, London, UK.*

20   \* *Present Address: Department of Genetic Engineering, Faculty of Biology-Oriented*  
21   *Science and Technology, Kindai University, Kinokawa, Japan.*

22  
23   **Corresponding author:** Monica Colaiácovo ([mcolaiacovo@genetics.med.harvard.edu](mailto:mcolaiacovo@genetics.med.harvard.edu))

24  
25   **Running Title:** GRAS-1 regulates early meiotic chromosome dynamics

26   **Keywords:** GRAS-1, CYTIP, Tamalin, GRASP, meiosis, germline, chromosome  
27   dynamics, homologous pairing, synapsis, licensing, DNA double-strand break repair.

28

29 **ABSTRACT**

30 Chromosome movements and licensing of synapsis must be tightly regulated during early  
31 meiosis to ensure accurate chromosome segregation and avoid aneuploidy, although  
32 how these steps are coordinated is not fully understood. Here we show that GRAS-1, the  
33 worm homolog of mammalian GRASP/Tamalin and CYTIP, coordinates early meiotic  
34 events with cytoskeletal forces outside the nucleus. GRAS-1 localizes close to the nuclear  
35 envelope (NE) in early prophase I and interacts with NE and cytoskeleton proteins.  
36 Delayed homologous chromosome pairing, synaptonemal complex (SC) assembly, and  
37 DNA double-strand break repair progression are partially rescued by the expression of  
38 human CYTIP in *gras-1* mutants, supporting functional conservation. However, *Tamalin*,  
39 *Cytip* double knockout mice do not exhibit obvious fertility or meiotic defects, suggesting  
40 evolutionary differences between mammals. *gras-1* mutants show accelerated  
41 chromosome movement during early prophase I, implicating GRAS-1 in regulating  
42 chromosome dynamics. GRAS-1-mediated regulation of chromosome movement is  
43 DHC-1-dependent, placing it acting within the LINC-controlled pathway, and depends on  
44 GRAS-1 phosphorylation at a C-terminal S/T cluster. We propose that GRAS-1 serves as  
45 a scaffold for a multi-protein complex coordinating the early steps of homology search  
46 and licensing of SC assembly by regulating the pace of chromosome movement in early  
47 prophase I.

48

49

50

## 51 INTRODUCTION

52 Meiosis is a specialized cell division process in which diploid germ cells give rise to  
53 haploid gametes (i.e., eggs and sperm) accomplished by following a single round of DNA  
54 replication with two consecutive rounds of chromosome segregation. To segregate properly,  
55 homologous chromosomes must undergo a series of steps that are unique to the first meiotic  
56 division and are conserved from yeast to mammals, including: (1) pairing, (2) assembly of the  
57 “zipper-like” synaptonemal complex (SC) between paired homologs, and (3) formation of  
58 programmed meiotic DNA double-strand breaks (DSBs) resulting in crossover recombination,  
59 leading to genetic diversity and physical attachments between homologs (Láscarez-Lagunas  
60 et al. 2020). Errors in any of these steps can result in impaired chromosome segregation and  
61 aneuploidy, which is associated with 20% of birth defects (e.g., Down Syndrome), 35% of  
62 clinically recognized miscarriages, infertility, and tumorigenesis (Webster and Schuh 2017).

63 During pairing, homologous chromosomes must physically align along their lengths;  
64 this is achieved by pronounced chromosome movements inside the meiotic nucleus driven by  
65 cytoskeletal forces. In mammals and worms, this is achieved through the LINC (linker of  
66 nucleoskeleton and cytoskeleton) protein complex, which transmits forces to the nucleus/NE  
67 via cytoskeletal microtubules and dynein (Link and Jantsch 2019, Zetka et al. 2020). In *C.*  
68 *elegans*, the meiotic LINC complex is formed by the KASH-domain protein ZYG-12 at the  
69 outer nuclear membrane and the SUN-domain protein SUN-1 at the inner nuclear membrane  
70 (Cohen-Fix and Askjaer 2017). SUN-1 interacts via yet unidentified factor(s) with one end of  
71 each chromosome carrying specific repetitive sequences (pairing centers, PCs) which are  
72 bound by PC end Zinc-finger-proteins. PC proteins facilitate chromosome movement until  
73 homologs begin pairing and assembling the SC (Hillers et al. 2017). The SC is a tripartite

74 structure composed of proteins assembled along chromosome axes (lateral elements) and  
75 proteins that bridge each pair of axes (central region components) (Lake and Hawley 2021).  
76 Studies in budding yeast, plants, flies, worms, and mammals, have shown that the SC is  
77 critical for stabilizing homologous chromosome pairing, the progression of meiotic  
78 recombination, crossover formation, and achieving accurate meiotic chromosome  
79 segregation (Zickler and Kleckner 2015). Work in *C. elegans* has identified proteins involved  
80 in regulating pairing and SC formation (Nadarajan et al. 2017; Alleva et al. 2017; Link et al.  
81 2018; Bowman et al. 2019; Castellano-Pozo et al. 2020), but how NE-associated proteins  
82 regulate chromosome dynamics during early prophase I is incompletely understood. Here we  
83 show that *C. elegans* GRAS-1, which is homologous to mammalian GRASP/Tamalin and  
84 CYTIP, localizes to the NE and is required for the regulation of chromosome movement.  
85 GRAS-1 limits the speed of dynein-microtubule driving forces and contributes to the licensing  
86 of SC assembly, ensuring adequate timing of key meiotic processes such as homologous  
87 chromosome pairing, SC assembly, and DSB repair progression. While mice *Tamalin*, *Cytip*  
88 double knockout (DKO) mutants did not display obvious SC and recombination defects,  
89 human CYTIP partially rescued a *gras-1* mutation, supporting functional conservation and  
90 suggesting evolutionary differences between the mammalian proteins. We propose a model  
91 by which GRAS-1 links NE-cytoskeleton-SC assembly and coordinates early meiotic events  
92 by acting as a brake during early meiotic prophase I chromosome movements.

93

## 94 **RESULTS**

### 95 ***GRAS-1 localization is meiosis-specific and contacts NE components***

96 A yeast-two hybrid screen for candidates interacting with worm SC proteins identified  
97 GRAS-1 (Smolikov et al. 2009). *gras-1* (ORF F30F8.3) encodes for a 245 amino acid  
98 protein containing PDZ (PSD-95/SAP90, Discs-large, and ZO-1) and coiled-coil (CC)  
99 domains (Fig. 1A). GRAS-1 shares a high degree of conservation with both human CYTIP  
100 (Cytohesin-interacting protein, 63% homology) and GRASP/Tamalin (General receptor  
101 for phosphoinositides 1-associated scaffold protein, 61% homology), due to a gene  
102 duplication event in chordates (Fig. 1A, B, TreeFam). No orthologs were found in fungi or  
103 plants. GRASP has been implicated as a scaffold for multi-protein complexes involved in  
104 processes such as epithelial cell migration and membrane trafficking (Kitano et al. 2002;  
105 Attar and Santy 2013). CYTIP plays roles in cell adhesion and the immune system  
106 (Heufler et al. 2008). In mice and humans, both GRASP and CYTIP are expressed in  
107 testes and ovaries (Fig. S1A) (Nevrivy et al. 2000; Uhlén et al. 2015; Human Protein  
108 Atlas). In worms, *gras-1* exhibits germline-enriched expression that is restricted to meiosis  
109 by the RNA-binding protein PUF-8 (Fig. S1B) (Kohara 2001; Reinke 2004; Ortiz et al.  
110 2014; Tzur et al. 2018; Mainpal et al. 2011). However, the meiotic functions for GRAS-1  
111 and its homologs remained unknown.

112 Different databases place GRAS-1 and its mammalian homologs at the plasma  
113 membrane, cytosol, membrane systems and the perinuclear region (WolFSORT, UniProt,  
114 Human Protein Atlas). The expression of a functional GRAS-1::GFP transgene revealed  
115 a meiosis-specific localization of GRAS-1 in both hermaphrodite and male germlines (Fig.  
116 1C, S1C). GRAS-1::GFP signal was detected both at germ cell membranes, as confirmed  
117 by SYN-4 and Phalloidin staining (Fig. S1D), and near the nuclear envelope in early  
118 prophase I, as determined by co-immunolocalization with phosphorylated nuclear

119 envelope protein SUN-1 (Fig. 1D; S8-pSUN-1). 73% of the nuclei in the  
120 leptotene/zygotene region had at least one S8-pSUN-1 aggregate contacting a GRAS-  
121 1::GFP signal (n=89) and 44% of the S8 pSUN-1 signals were in contact with GRAS-  
122 1::GFP (n=215, 13 gonads). Super-resolution microscopy analysis of a worm line  
123 expressing both SUN-1::mCherry and GRAS-1::GFP further supports GRAS-1  
124 localization close to the NE (Fig. 1E). Moreover, GRAS-1::GFP localization appears to be  
125 largely independent of meiotic DSB production and SC formation (Fig. S1E). Using a  
126 transgenic line expressing GRAS-1-GFP for pull-downs and mass spectrometry analysis,  
127 we found proteins previously shown to be expressed in the germline (Fig. 1F). GRP-1  
128 appeared as the most enriched protein in all 4 replicates and specific to the GRAS-1::GFP  
129 pull-downs. GRP-1 is the worm ortholog of human Cytohesin 1 protein, the main structural  
130 and functional partner of CYTIP (Heufler et al. 2008; Teuliere et al. 2014), supporting  
131 conservation between the proteins. Many of the proteins identified included NE-  
132 associated proteins, such as tubulins, PLK-1, importins, the KASH protein KDP-1, and  
133 cytoskeleton or spindle structural and motor components. Based on their GO terms or  
134 WormBase-described functions and/or localization, germline hits were classified into the  
135 following categories: nuclear envelope, spindle/cytoskeleton, meiosis, chromatin, or  
136 general germline-expressed proteins. The majority of proteins (667 out of 774, excluding  
137 GRAS-1) had a greater than 1.5 fold-change suggesting GRAS-1::GFP interactors are  
138 localized to/interact with the NE or cytoskeleton (Fig. 1G).

139

140 ***GRAS-1 is required for normal meiotic progression and accurate chromosome***  
141 ***segregation***

142 To assess the roles of *gras-1* in the germline, we analyzed the fertility of various *gras-1*  
143 alleles including an out-of-frame deletion between the first and second exons (*tm2699*),  
144 a partial deletion and frameshift from amino acid 89 (*rj15*), and whole-gene deletions (*rj27*  
145 and *rj28*) (Fig. 1A). While all mutants had normal brood sizes, most exhibited a mild but  
146 significant increase in the number of eggs laid that failed to hatch (embryonic lethality),  
147 elevated levels of male progeny (indicating meiotic chromosome nondisjunction), and  
148 increased larval lethality (Fig. S1F, 2A). To assess the effects of complete absence of  
149 GRAS-1 protein, all subsequent analyses were performed in *gras-1(rj28)* mutants.

150 Analysis of meiotic progression revealed an extension in the number of rows of  
151 nuclei exhibiting phosphorylated SUN-1 (S8 pSUN-1) signal in *gras-1* null mutants  
152 compared to wild type ( $22.8 \pm 0.6$  and  $19.5 \pm 0.5$ , respectively;  $p=0.0001$ , Mann Whitney U-  
153 test, Fig. 2B). This was accompanied by an increase in the number of rows of nuclei with  
154 chromosomes exhibiting the characteristic configuration of leptotene/zygotene stage  
155 nuclei in *C. elegans* ( $14 \pm 0.3$  and  $10.9 \pm 0.1$ , respectively;  $p < 0.0001$ ) (Fig. 2B). This  
156 alteration in meiotic progression is further supported by a delay in Polo-like kinase PLK-  
157 2 translocating from the nuclear periphery to synapsed chromosomes by the end of early  
158 pachytene ( $19 \pm 0.5$  rows of nuclei in wild type and  $21.9 \pm 1$  in *gras-1*,  $p=0.0351$ ) (Fig. S2A).  
159 These data suggest that GRAS-1 is required for normal meiotic progression and accurate  
160 chromosome segregation.

161

162 ***GRAS-1 is necessary for timely homologous chromosome pairing and synapsis in***  
163 ***an  $\alpha$ -importin-independent manner***

164 Because delays in meiotic progression during early prophase I can arise from problems  
165 in homolog pairing (Smolikov et al. 2007a; Sato et al. 2009; Alleva et al. 2017), we  
166 measured X chromosome pairing throughout meiosis by immunostaining for the X  
167 chromosome-specific PC protein HIM-8 (Phillips et al. 2005). During leptotene/zygotene  
168 and early pachytene stages, we observed higher levels of nuclei with two unpaired HIM-  
169 8 foci in *gras-1* mutants compared to wild type ( $p < 0.0001$  in leptotene/zygotene stage and  
170  $p = 0.008$  in early pachytene, Fisher's Exact Test) (Fig. 2C).

171 Early pachytene nuclei with unpaired HIM-8 foci in *gras-1* mutants also showed a  
172 discontinuous SC or aggregates of the SC central region protein SYP-1, in contrast to the  
173 continuous SC tracks detected in wild type (a mean of  $2.28 \pm 0.24$  compared to  $0.4 \pm 0.08$   
174 nuclei with SYP-1 aggregates in *gras-1* and wild type, respectively;  $p < 0.0001$ , Mann  
175 Whitney U-test) (Fig. 2D). Discontinuities of the central region of the SC, but not of axial  
176 element proteins such as HTP-3, were also detected along chromosomes in mid-  
177 pachytene nuclei of whole mounted germlines from *gras-1* mutants compared to wild type  
178 (16.9% and 5.1%, respectively;  $p = 0.002$ , Fisher's Exact test) (Fig. S2B) and further  
179 confirmed on squash preparations (14.8% and 5.4%, respectively;  $p = 0.0032$ ) (Fig. 2E).

180 The  $\alpha$ -importin nuclear transport IMA-2 protein and the Akirin protein AKIR-1 have  
181 been proposed to act through parallel pathways to ensure normal chromosome synapsis  
182 by promoting import and chromosomal loading of cohesin complex proteins. For instance,  
183 *akir-1; ima-2* double mutants exhibit an increased number of nuclei with SC aggregates  
184 and discontinuities due to the abnormal loading of axis and cohesin proteins (Bowman et  
185 al. 2019). However, axial element proteins HTP-3 and HIM-3 and the meiosis-specific  
186 cohesin REC-8 were correctly loaded on the chromosomes in *gras-1* mutants, suggesting



187 that SC complex defects may be caused by other mechanisms (Fig. 2D, E). Moreover,  
188 REC-8 localization was not altered in *gras-1* and *ima-1* or *ima-2*, double and triple mutants  
189 (Fig. S2C). Interestingly, we detected interaction of GRAS-1 with multiple SC central  
190 region proteins, including SYP-3 by western blot analysis of GRAS-1::GFP pull downs  
191 (Fig. S3A), and SYP-1, SYP-2, and SYP-3 by yeast two-hybrid analysis (Fig. S3B). Taken  
192 together, these studies support a role for GRAS-1 in promoting timely homologous  
193 chromosome pairing and SC assembly in an  $\alpha$ -importin-independent manner during early  
194 prophase I.

195

196 ***Early prophase I chromosome movement is limited by GRAS-1 in a dynein-***  
197 ***dependent manner***

198 The delay in homologous pairing and SC assembly observed in *gras-1* mutants is similar  
199 to that detected in mutants where chromosome movement is impaired (Wynne et al. 2012;  
200 Sato et al. 2009; Woglar et al. 2013). Therefore, we assessed chromosome movement  
201 by live imaging analysis of SUN-1::mRuby;GFP::H2B aggregates (marking chromosome  
202 ends) during meiosis in wild type and *gras-1* young adult worms. Surprisingly, SUN-1  
203 aggregates moved at a greater speed and traveled higher distances in *gras-1* mutants  
204 compared to wild type ( $84.47 \pm 1.05$  nm/s, average total distance traveled in 60s of  
205  $5.03 \pm 0.1$   $\mu$ m, and  $50.55 \pm 0.82$  nm/s, average total distance traveled in 60s of  
206  $2.99 \pm 0.07$   $\mu$ m, respectively,  $p < 0.0001$  Student's t-test) (Fig. 3A). Moreover, we did not  
207 observe increases in the area of the SUN-1 aggregates that could suggest more power  
208 to move chromosomes ( $0.184 \pm 0.006$   $\mu$ m in wild type and  $0.179 \pm 0.006$   $\mu$ m in *gras-1*,  
209  $p = 0.5834$ ).

210           Since the key motor protein involved in promoting early prophase I chromosome  
211 movement in *C. elegans* is dynein (Wynne et al. 2012), we examined if the increased  
212 SUN-1 speed in *gras-1* mutants was mediated by dynein. Wild type worms depleted of  
213 *dhc-1* by RNAi (Fig. S3C; Labrador et al. 2013) exhibited minimal SUN-1 movement with  
214 short tracks after 1 minute of imaging and reduced average speed per aggregate  
215 ( $51.37 \pm 0.74$  nm/s for wild type and  $32.66 \pm 0.58$  for *dhc-1(RNAi)*,  $p < 0.0001$ , Student's t-  
216 test) (Fig. 3B, video S1). The increased speed of SUN-1 observed in *gras-1;EV* (empty  
217 vector) worms was lost in *dhc-1(RNAi);gras-1* worms ( $76.37 \pm 1.03$  for *gras-1* and  
218  $36.21 \pm 0.51$  for *dhc-1(RNAi);gras-1*,  $p < 0.0001$ ) (Fig. 3B, video S1). Furthermore, the two  
219 types of chromosome movement speeds described for *C. elegans* leptotene/zygotene  
220 stage nuclei (processive-chromosome motions with higher speeds in one direction and  
221 short-distance movements close to one point; Wynne et al. 2012; Labrador et al. 2013)  
222 observed in wild type and exacerbated in *gras-1* were absent upon *dhc-1* depletion with  
223 the majority of aggregates displaying a speed around 20-30nm/s (Fig. 3B, rightmost  
224 panel). Therefore, the increased speed found in *gras-1* was completely dependent on  
225 DHC-1.

226           Meiotic progression was further impaired in *dhc-1;gras-1* compared to the single  
227 *dhc-1* mutant. Compared to wild type, lack of DHC-1 causes a mild extension of the  
228 leptotene/zygotene stages ( $11.19 \pm 0.36$  and  $12.08 \pm 0.41$  rows of nuclei in wild type and  
229 *dhc-1*, respectively,  $p = 0.18$ , Mann-Whitney U-test) and a significant increase in the  
230 presence of SC aggregates in early pachytene ( $2.27 \pm 0.46$  and  $6.19 \pm 0.91$  nuclei with  
231 SYP-1 aggregates per gonad in wild type and *dhc-1*, respectively,  $p = 0.0044$ ) (Fig. 3C and  
232 Sato et al. 2009). *dhc-1;gras-1* double mutant germlines showed a further increase in the

233 number of nuclei with chromatin exhibiting a leptotene/zygotene stage appearance  
234 compared to *dhc-1* alone ( $14.62 \pm 1$  leptotene/zygotene rows in *dhc-1;gras-1*,  $p=0.0251$ )  
235 (Fig. 3C), and significantly higher levels of SYP-1 aggregates compared to single mutants  
236 ( $12.35 \pm 1.78$  nuclei with SYP-1 aggregates in *dhc-1;gras-1* compared to  $6.19 \pm 0.91$  in *dhc-*  
237 *1* and  $4.88 \pm 0.63$  in *gras-1*,  $p=0.0044$  and  $0.0005$ , respectively) (Fig. 3C). Additionally,  
238 more of these persistent leptotene/zygotene-like nuclei with SYP-1 aggregates were  
239 detected in later stages of prophase I in *dhc-1;gras-1* than in *dhc-1* mutants ( $13.2 \pm 1.22$   
240 rows after leptotene/zygotene entry in *dhc-1;gras-1* compared to  $10 \pm 0.89$  in *dhc-1*,  
241  $p=0.0350$ ) (Fig. 3C, lower panel). Altogether, these data indicate a DHC-1-dependent role  
242 for GRAS-1 in limiting chromosome movement/speed in early prophase. However,  
243 exacerbated phenotypes, such as the increased number of SYP-1 aggregates, contrast  
244 with the epistatic relationship observed for DHC-1 and GRAS-1 in chromosome  
245 movement speed, and suggest that GRAS-1 might exert additional functions in regulating  
246 meiotic progression.

247

### 248 ***GRAS-1 contributes to normal meiotic DSB repair progression***

249 Mutants with altered SC assembly frequently exhibit impaired recombination since the SC  
250 is required for normal DSB repair progression and crossover formation (Colaiácovo et al.  
251 2003; Smolikov et al. 2007b, 2009; Bowman et al. 2019). To assess DSB repair in the  
252 absence of GRAS-1, we immunostained gonads for RAD-51, a protein involved in strand  
253 invasion/exchange steps during homologous recombination (Sung 1994; Alpi et al. 2003;  
254 Colaiácovo et al. 2003). *gras-1* mutants exhibited a reduction in the number of RAD-51  
255 foci observed per nucleus from leptotene/zygotene through mid-pachytene stages and a

256 slight increase in late pachytene compared to wild type ( $p=0.049$  for leptotene/zygotene,  
257  $p<0.0001$  for mid-pachytene, and  $p=0.039$  for late pachytene, Mann-Whitney U-test) (Fig.  
258 4A). The increased RAD-51 foci were dependent on the topoisomerase-like SPO-11  
259 protein required for meiotic DSB formation (Fig. S3D). Unrepaired recombination  
260 intermediates persisting into late pachytene can result in increased germ cell apoptosis  
261 (Gartner et al. 2000). We detected a significant increase in germ cell apoptosis in *gras-1*  
262 mutants compared to wild type ( $3.69\pm 0.21$  and  $1.97\pm 0.17$  mean number of germ cell  
263 corpses respectively,  $p<0.0001$ , Mann-Whitney U-test) (Fig. 4B). Moreover, the increase  
264 in germ cell apoptosis was also meiotic DSB-dependent given that apoptosis levels were  
265 no longer elevated in *gras-1* mutants in the absence of SPO-11 (Fig. S3E). Crossover  
266 designation levels were not altered as determined by quantification of the number of foci  
267 for ZHP-3, the ortholog of budding yeast Zip3 that marks sites designated for crossover  
268 formation in late pachytene nuclei ( $5.99\pm 0.02$  and  $6.07\pm 0.05$  ZHP-3 foci per nucleus in  
269 wild type and *gras-1*, respectively,  $p=0.06$ , Mann-Whitney U-test). However, a delay in  
270 the restriction of ZHP-3 signal from tracks to foci was observed in *gras-1* mutants (Fig.  
271 4C). Analysis of oocytes at diakinesis revealed 6 bivalents in both wild type and *gras-1*  
272 mutants with only one oocyte exhibiting a fragile connection between a pair of homologs  
273 in *gras-1* (Fig. 4D) (Saito et al. 2009). However, analysis of *gras-1* mutants also lacking  
274 the *ced-3* caspase (Yuan et al. 1993), which prevents germ cell apoptosis in late  
275 pachytene, revealed an increase in the total number of oocytes with chromosome  
276 abnormalities ( $p=0.0436$  compared to wild type, Fisher's exact test) including univalents,  
277 fragile connections, and interbivalent attachments (Fig. 4D). This was accompanied by  
278 higher levels of embryonic lethality, larval lethality, and male progeny in *gras-1;ced-3*

279 mutants compared to *ced-3* alone (14.3% vs 5.1% embryonic lethality,  $p < 0.0001$ ; 5% vs  
280 2.5% larval lethality,  $p < 0.0001$ ; and 0.6% vs 0.2% males,  $p = 0.004$ , Fisher's exact test)  
281 (Fig. 2A). These combined data suggest that GRAS-1 is required for normal meiotic DSB  
282 repair progression and maintenance of genomic integrity in the germline.

283

284 ***GRAS-1's function in limiting chromosome movement in early prophase I is***  
285 ***regulated by phosphorylation at a C-terminal S/T cluster***

286 Analysis with different protein phosphorylation prediction programs (Kinase 2.0, NetPhos  
287 3.1 and PHOSIDA) identified S233 and S236 as putative phosphorylation sites within a  
288 S/T cluster domain (SSTS) at the C-terminus of GRAS-1 (Fig. 1A). These sites are  
289 conserved in human CYTIP (S269 and S270) and GRASP/Tamalin (S293), the former  
290 being strongly conserved in other vertebrates (PER viewer) (Pérez-Palma et al. 2020). *In*  
291 *vivo* phosphorylation of GRAS-1 at this S/T cluster was confirmed by mass spectrometry  
292 analysis (Fig. 5A and 5B; shown is phosphorylation at S233). Since more than one  
293 residue at the SSTS cluster may be phosphorylated, we used CRISPR-Cas9 to edit all  
294 four amino acids to either alanine (A) or aspartic acid (D) to generate phosphodead (*gras-*  
295 *1PD*) and phosphomimetic (*gras-1PM*) mutants, respectively (Fig. 5C). Analysis of *gras-*  
296 *1PD* and *gras-1PM* mutants revealed a normal number of eggs laid but increased  
297 embryonic and larval lethality compared to wild type (Fig. 5D). *gras-1PD* mutants  
298 exhibited levels similar to *gras-1* null (3.1% embryonic lethality in both,  $p > 0.99$ , and 0.6%  
299 larval lethality in *gras-1PD* and 0.97% in *gras-1*,  $p = 0.031$ , Fisher's exact test). In contrast,  
300 the number of male progeny in phosphodead or phosphomimetic mutants was  
301 indistinguishable from wild type (Fig. 5D, right panel). To assess whether GRAS-1

302 phosphorylation is required for its role in limiting chromosome movement in early  
303 prophase I, we analyzed the speed of SUN-1::mRuby aggregates in *gras-1PD* and *gras-*  
304 *1PM* mutants (Fig. 5E, videos S2). The inactivation of the phosphorylation domain in *gras-*  
305 *1PD* produced a higher average speed per aggregate compared to wild type ( $65.18 \pm 1.12$   
306 nm/s and  $51.37 \pm 0.74$  nm/s, respectively, 325 and 245 aggregates,  $p < 0.0001$ , Student's  
307 t-test), but not as elevated as in the *gras-1* null mutant ( $73.17 \pm 1.09$  nm/s, 270 aggregates,  
308  $p < 0.0001$ ). In contrast, mimicking a phosphorylated SSTS domain resulted in  
309 chromosome movement speeds similar to those observed in wild type ( $53.05 \pm 0.65$  nm/s  
310 in *gras-1PM*, 343 aggregates,  $p = 0.0872$ ). Depletion of dynein by RNAi in the  
311 phosphodead and phosphomimetic mutants resulted in SUN-1 aggregates indicating  
312 non-processive chromosome motions with slower speeds (Fig. 5E, lower right panel).  
313 These results suggest that GRAS-1 function is regulated by phosphorylation at these  
314 conserved C-terminal residues.

315

### 316 ***GRAS-1 shares partial functional conservation with human CYTIP***

317 The fact that GRAS-1 protein structure, phosphorylation, and reproductive tissue  
318 expression seem to be conserved in mammals (Fig. 1A, S1A) suggests that similar  
319 functions could be performed by either CYTIP and GRASP/Tamalin in mammals. To test  
320 this possibility, we first examined *Tamalin*, *Cytip* DKO mouse mutants (Fig. S4A). The  
321 mouse mutants had fertility rates, testis weight, and seminiferous tubule morphology  
322 equivalent to littermate controls (Fig. S4B). Analysis of meiotic progression in chromatin  
323 spreads from both male and female *Tamalin*, *Cytip* DKO immunostained with  $\gamma$ H2AX to  
324 assess DSB formation and SYCP3 to examine chromosome synapsis did not reveal any

325 defects compared to controls in oocytes (Fig. 6A) and spermatocytes (Fig. S4C). Analysis  
326 of DSB repair progression by immunostaining meiotic prophase I cells for RPA revealed  
327 normal levels relative to controls in oocytes (Fig. 6B), and the ATR DNA damage  
328 response kinase and RPA in spermatocytes (Fig. S4D, E). The formation of the central  
329 element of the SC also showed normal progression in oocytes (Fig. S5A). Finally, the  
330 number of crossover recombination events determined by assessing MLH1 foci in  
331 spermatocytes and CDK2 in oocytes from *Tamalin*, *Cytip* DKO mice was the same as in  
332 wild type (Fig. S5B,  $1.09 \pm 0.02$ ,  $n=409$ , and  $1.08 \pm 0.02$ ,  $n=416$ , MLH1 foci on  
333 chromosomes in the control and DKO, respectively,  $p=0.7641$  Mann-Whitney test; Fig.  
334 S5C,  $3.14 \pm 0.03$ ,  $n=427$ , and  $3.18 \pm 0.02$ ,  $n=451$ , CDK2 foci in the control and DKO  
335 respectively,  $p=0.2332$ ). These results are similar to the crossover analysis in the worm  
336 *gras-1* mutant in which levels of ZHP-3 foci were indistinguishable from wild type.

337         Even though mutant *Tamalin*, *Cytip* DKO mice did not present obvious fertility or  
338 meiotic defects, GRAS-1 function could still be conserved to a lesser extent or diverged  
339 in mice but not in other vertebrates. To assess functional conservation with the human  
340 orthologs, we complemented *gras-1* null worms with the human cDNA of CYTIP, the  
341 ortholog with the highest sequence similarity. Using the SKI LODGE system (Silva-García  
342 et al. 2019) we introduced a cassette into chromosome III with expression of the human  
343 coding sequence driven by the *pie-1* germline-specific promoter (Fig. S5D). We examined  
344 DSB repair progression by RAD-51 immunostaining of germlines from wild type, *gras-1*  
345 null carrying an empty vector cassette inserted in chromosome III, and *gras-1* expressing  
346 human CYTIP (Fig. 6C). *gras-1*;*CYTIP* exhibited a partial rescue relative to *gras-1* with  
347 RAD-51 levels increasing in early pachytene, albeit not reaching the same levels as in

348 wild type until mid-pachytene ( $1.47 \pm 0.10$  foci/nucleus in wild type and  $0.87 \pm 0.10$  in *gras-*  
349 *1;CYTIP*,  $p < 0.0001$ , Mann-Whitney U-test), and a partial reduction in the levels observed  
350 in late pachytene ( $1.99 \pm 0.14$  and  $0.84 \pm 0.11$  foci in late pachytene in zones 6 and 7,  
351 respectively, in wild type;  $3.64 \pm 0.19$  and  $1.96 \pm 0.17$  in *gras-1;CYTIP*,  $p < 0.0001$ ).  
352 Therefore, human CYTIP expression in *gras-1* null mutants resulted in an intermediate  
353 phenotype between *gras-1* null and wild type. Similarly, we observed reduced levels of  
354 germ cell corpses in *gras-1* worms complemented with CYTIP compared to *gras-1* null  
355 ( $6.23 \pm 0.40$  in *gras-1;empty* and  $3.5 \pm 0.27$  in *gras-1;CYTIP*,  $p < 0.0001$ , Fisher's exact test),  
356 but not a complete reversion to wild type levels ( $2.14 \pm 0.28$ ,  $p = 0.001$ ) (Fig. 6D). A partial  
357 rescue of the SC assembly defects was also observed with lower levels of SC aggregates  
358 in early pachytene (Fig. S5E). These results suggest that GRAS-1 protein function could  
359 play similar roles in vertebrates, but the divergence of the proteins and the duplication  
360 might affect the processes involved.

361

## 362 **DISCUSSION**

363 Early prophase I events are key determinants of correct chromosome segregation  
364 at meiosis I and therefore need to be tightly coordinated. In the present study, we uncover  
365 a layer of regulation for these events mediated by the conserved GRAS-1 protein. We  
366 propose that GRAS-1 connects the stabilization of homologous chromosome pairing with  
367 the licensing of SC formation between homologs by limiting chromosome movement  
368 during early prophase I (Fig. 6E). We suggest that GRAS-1 acts as a scaffold connecting  
369 proteins implicated in both processes, thereby establishing a physical link between the  
370 nuclear envelope and cytoplasmic structures.



371 GRAS-1 expression increases in germline nuclei during the transition from mitosis  
372 into meiotic prophase I (Fig. 1C, S1B) and GRAS-1 localizes near the germ cell NE (Fig.  
373 1E, S1D). GRAS-1 localization seems to be more dispersed compared to the membrane  
374 actin fibers and cell membrane components such as SYX-4 (Sato et al. 2008) (Fig. S1D).  
375 GRAS-1 contacts the NE cytologically (Fig. 1D, E) and mass spectrometry results from  
376 GRAS-1::GFP pull-downs show that GRAS-1 may interact directly or indirectly with  
377 several NE proteins and numerous tubulin, actin, spindle, and chromosome segregation  
378 proteins (Fig. 1F, G). Among these are separase, a caspase-related protease that  
379 regulates sister chromatid separation (Alexandru et al. 2001; Hornig and Uhlmann 2004),  
380 the protein phosphatase PP1 orthologs GSP-1/2 with various roles including regulation  
381 of sister chromatid cohesion upon entrance into meiosis (Ceulemans and Bollen 2004;  
382 Tzur et al. 2012), and PLK-1, whose meiotic role in phosphorylating key chromosome  
383 movement regulators and SC components could be an important effector for GRAS-1  
384 function during early prophase I (Labella et al. 2011; Woglar et al. 2013; Nadarajan et al.  
385 2017). Another putative interaction partner of GRAS-1 is LMN-1, which also plays an  
386 important role in chromosome movement and supports a connection for GRAS-1 with  
387 structural components of the NE (Phillips et al. 2005; Link et al. 2018). The motor protein  
388 kinesin KLP-17 provides an additional target by which GRAS-1 chromosome movement  
389 functions could be connected. Kinesins produce opposite movements of cargo proteins  
390 to dyneins and the *C. elegans*-specific KLP-17 protein is expressed in the germline, has  
391 microtubule binding activity, and has been proposed to have chromosome movement and  
392 segregation activity (Siddiqui 2002; Robin et al. 2005; Heppert et al. 2018). The KASH  
393 domain protein KDP-1 is implicated in cell cycle progression and its localization depends

394 on SUN-1 in the germline (McGee et al. 2009). The LINC complex protein KDP-1 interacts  
395 with SUN-1 or UNC-84 at the NE and could interact with other SUN-1 partners, although  
396 its role during meiosis requires further investigation. Finally, nucleoporins and importins  
397 identified in the pull-downs (NPP-3, NPP-13, IMA-2, and IMA-3) have been implicated in  
398 regulating chromosome attachment to the NE, chromosome movement, meiotic  
399 recombination, chromosome segregation, and the timely incorporation of SC proteins  
400 (Bowman et al. 2019; Palacios et al. 2021). However, our analysis of *gras-1* in  
401 combination with *ima-1* and *ima-2* mutants does not support them acting in the same  
402 pathway.

403 Our data indicate that GRAS-1 acts to limit chromosome movement (Fig. 3).  
404 GRAS-1 could impose resistance to the free movement of chromosomes from outside of  
405 the nucleus when they find a homologous partner, thereby stabilizing that connection (Fig.  
406 6E). In *C. elegans*, similarly to mice and *S. pombe*, the cytoskeletal forces driving the  
407 movement of chromosomes from outside the nucleus are controlled by microtubules and  
408 the motor protein dynein connecting to the chromosome-LINC complex (Sato et al. 2009;  
409 Wynne et al. 2012; Zetka et al. 2020). GRAS-1 may function in the same pathway and  
410 limit the action of dynein and microtubules since dynein depletion in the absence of  
411 GRAS-1 results in chromosome movements similar to those in the dynein mutant alone  
412 (Fig. 3B). Although mutations in co-chaperone FKB-6 increase meiotic chromosome  
413 movement (Alleva et al. 2017), GRAS-1 must act through a different pathway since *fkf-6*  
414 mutants showed decreased resting time between chromosome movements, whereas  
415 aggregates in *gras-1* had increased general speeds (Fig. 3A). Further, the *fkf-6* mutant  
416 in combination with either *dhc-1* depletion or a *zyg-12* mutant did not exhibit exacerbated

417 defects in SC formation or chromosome pairing, in contrast with *dhc-1(RNAi);gras-1*  
418 mutants where these defects are accentuated (Fig. 3C). Moreover, FKB-6 was not  
419 identified in GRAS-1::GFP pull-downs, and its localization was more dispersed  
420 throughout the cytoplasm in contrast to the membrane localization for GRAS-1. Further,  
421 FKB-6 expression was not meiosis-specific, which is connected with a role for FKB-6 in  
422 regulating microtubule formation and mitotic segregation in the *C. elegans* germline  
423 (Alleva et al. 2017). Additionally, cytoplasmatic protein vinculin/DEB-1 has also been  
424 proposed to limit the movement of LINC complexes and produce abnormal synapsis  
425 (Rohožková et al. 2019). We believe GRAS-1 functions in a different way than  
426 vinculin/DEB-1 because of the differences in localization and phenotypes: *deb-1* mutants  
427 had a high number of univalents at diakinesis, defects in the loading of proteins along  
428 meiotic chromosome axes (which could be the cause of the severe synapsis defects  
429 observed), and their pairing defects are opposite to that in *gras-1* since they initially have  
430 the same level of pairing as wild type worms, but then homologs do not achieve complete  
431 pairing in most pachytene nuclei.

432         The excess chromosome movement found in the absence of GRAS-1 could be the  
433 reason for the extension in leptotene/zygotene stages, the pairing delays, and the altered  
434 DSB repair progression observed in the germline (Fig. 2B, C and Fig. 4). However, GRAS-  
435 1 could be involved in transmitting additional signals once homologs find a partner, since  
436 in *dhc-1;gras-1* double mutants there were more instances of SC aggregates and those  
437 appear in late pachytene (Fig. 3C and Fig. 6E). One possibility is that GRAS-1 helps  
438 license the initial assembly of the SC from the PC ends of paired chromosomes, so that  
439 in the absence of GRAS-1 homologs do not stay together long enough and the imported

440 SC proteins self-aggregate. However, if that were the case we would expect the SC  
441 defects to affect most nuclei, as observed for the defects in chromosome movement.  
442 Alternatively, GRAS-1 may regulate the loading of SC proteins via a yet unknown  
443 mechanism, given the incomplete polymerization of SYP-1 observed in *gras-1* mutants at  
444 mid-pachytene stage (Fig. 2D, E). This is further supported by the presence of SYP-3 in  
445 GRAS-1::GFP pull-downs assessed on westerns and interactions with SYP-1/2/3 in yeast  
446 two-hybrid assays (Fig. S3A, B). If GRAS-1 regulates SC assembly and/or loading, it does  
447 so in a manner that is distinct from the combined role of Akirin with importins (Bowman et  
448 al. 2019) since we did not find evidence of cohesin or axial element defects in *gras-1*  
449 mutants alone, or in combination with *ima-1* and *ima-2* (Fig. 1E, S2C).

450 GRAS-1 is conserved in animals, and the gene underwent a duplication event in  
451 chordates resulting in CYTIP and GRASP/Tamalin (Fig. 1A, B). All three proteins carry  
452 PDZ and coiled-coil domains, usually involved in protein-protein interactions. In addition,  
453 they carry a disorganized C-terminal region (longer in the mammalian orthologs) that  
454 could be involved in regulating their function since a phosphorylated serine in the S/T  
455 cluster is conserved in both human CYTIP and GRASP. In addition, GRAS-1 protein  
456 interactions might also be conserved since mammalian CYTIP and GRASP have been  
457 found to interact with Cytohesin-1 (Heufler et al. 2008; Kitano et al. 2002; Teuliere et al.  
458 2014) and the worm ortholog, GRP-1, was a top and specific hit in all GRAS-1::GFP pull-  
459 down experiments. Similar to worm *gras-1* mutants, *Tamalin*, *Cytip* DKO mice did not  
460 exhibit severe fertility defects or crossover recombination problems (Fig. 6). However,  
461 DKO mice also did not show defects in meiotic progression, chromosome synapsis, and  
462 DSB repair progression (Fig. 6, S4, S5). Meiotic progression defects may be more easily

463 detected in *gras-1* mutant worms because of the spatiotemporal organization of meiosis  
464 within intact worm gonads that facilitates the observation and quantification of subtle  
465 defects compared to individual cell spreading techniques in mouse samples. Gene  
466 duplication divergence might also explain these differences because CYTIP and GRASP  
467 are sometimes expressed in different tissues and often have distinct roles (Uhlén et al.  
468 2015; Yanpallewar et al. 2012; Coppola et al. 2006). However, protein structure and  
469 functions could still be conserved throughout evolution to partially complement worm  
470 GRAS-1 function with the closest human ortholog, CYTIP (Fig. 6 and S5D, E). Moreover,  
471 there could be differences between the mouse and human proteins, or subtle phenotypes  
472 or timing issues in the double KO that we could not detect.

473 In conclusion, we propose a model for the conserved GRAS-1 protein during  
474 meiosis in which its localization and protein interactions limit the movement of  
475 chromosomes in early prophase I. GRAS-1 may function to stabilize connections between  
476 homologs by serving as a protein scaffold connecting the NE environment with  
477 cytoskeletal forces to license SC assembly (Fig. 6E).

478

## 479 **MATERIALS AND METHODS**

### 480 *Worm strains and growth conditions*

481 N2 Bristol worms were used at the wild-type background. Lines were cultured under  
482 standard conditions as in (Brenner 1974). Some mutant lines were obtained from the  
483 Caenorhabditis Genetics Center (CGC) and from the National BioResource Project for  
484 the nematode *C. elegans* (NBRP, Japan). *gras-1* mutant lines were generated using the

485 CRISPR-Cas9 system (Kim and Colaiácovo 2016; Tzur et al. 2013). A deletion from +295  
486 to 189 post termination codon nucleotides was initially generated (*rj15*). Full deletion lines  
487 from -28 to 52 post termination codon nucleotides (*rj27*) and start codon to 27 nucleotides  
488 after the stop codon (*rj28*), not affecting the promoter of operon CEOP1424, were  
489 generated using sgRNA GTTTATCTCTGAACACTCAT and the PAM sequence was  
490 mutated from GGG to AGA. The *gras-1(rj28)* allele was used for these studies since the  
491 deletion in *rj27* partly extends into the promoter.

492 A *gras-1::gfp* line was generated using sgRNA TACTAGAGACGCGTGACTTG, a  
493 linker (ggcggcagcggc) and GFP sequence (pPD95.67) before the stop codon. The  
494 guideRNA sequence was mutated to avoid re-cutting. Phosphodead (*gras-1PD*) and  
495 phosphomimetic (*gras-1PM*) mutants were produced using the sgRNAs  
496 CACGCTTTACGAACTTGAT and TTTACTAGAGACGCGTGACT, respectively, and by  
497 changing the PAMs or sgRNA region to synonymous codons to avoid re-cutting. Changes  
498 in codons 233 to 236 were made so that SSTS amino acids were mutated into AAAA or  
499 DDDD, respectively. All three CRISPR-Cas9-engineered lines were produced by  
500 SunyBiotech (Fu Jian, China).

501 Complementation lines expressing HsCYTIP (Dharmacon, MHS6278-202807568)  
502 and HsGRASP (Dharmacon, MHS6278-202759705) cDNAs were generated using the  
503 SKI-LODGE system (Silva-García et al. 2019). HsCYTIP was inserted into *wbmls60[pie-*  
504 *1p::3xFLAG::dpy-10 crRNA::unc-54 3'UTR, III]* using *dpy-10* crRNA as a target and a  
505 PCR template with homology arms including a GFP artificial intron (pPD95.67,  
506 gtaagttaaacaatatataactaactaacctgattatttaaatttcag) before the CYTIP start codon.  
507 CRISPR-generated mutations were Sanger-sequenced (Macrogen). CGC and NBRP

508 mutants were outcrossed at least 6 times with N2. CRISPR-Cas9 generated lines were  
509 outcrossed at least 4 times with N2. A full list of the strains used in this study can be found  
510 in Supplemental Table 1.

511

#### 512 *Yeast two-hybrid analysis*

513 GRAS-1 was found in a yeast two-hybrid screen designed to identify proteins interacting  
514 with the SC central region protein SYP-3 (Smolikov et al. 2009). This was confirmed by  
515 using GRAS-1 full length,  $\Delta N^{69-245}$ , and  $\Delta C^{1-163}$  cloned into Gateway destination vector  
516 pVV213 (activation domain, AD). pVV212 (Gal4 DNA binding domain, DB) was used to  
517 clone SYP-1/2/3/4 full length, N-terminal, and C-terminal constructs described in  
518 (Smolikov et al. 2009; Schild-Prüfert et al. 2011). Strains were mated on YPD and  
519 selected on SC Leu- Trp- plates as described in (Walhout and Vidal 2001; Saito et al.  
520 2012).

521

#### 522 *Immunoprecipitation and MS analysis*

523 24h post-L4 worms expressing GRAS-1::GFP were collected, frozen, and homogenized,  
524 and an anti-GFP antibody used for immunoprecipitation as in (Nadarajan et al., 2016 and  
525 Gao et al., 2015), in four independent experiments. To identify the interacting proteins in  
526 GRAS-1::GFP pull-downs and examine the phosphorylation status of GRAS-1, a  
527 proteoExtract protein precipitation kit (Calbiochem, #539180) was used followed by mass  
528 spectrometry analysis (Taplin Biological Mass Spectrometry Facility, HMS, MA). Protein  
529 interactors were curated using 4 independent controls and the 4 independent GRAS-  
530 1::GFP experiments using the Normalized Spectral Abundance Factor method (Zybailov

531 et al. 2006), normalizing by protein weight, the total number of peptides per experiment,  
532 substituting the hits not found in a particular experiment by the 100 times lowest  
533 percentile, and bait correction factor. Fold-change relative to the controls was calculated  
534 using the average of the 4 experiments normalized to the bait peptides. T-student test  
535 was used to determine which proteins with greater than 1.5-fold-change were statistically  
536 significant and corrected by the number of hypothesis. A volcano plot was generated  
537 using the log<sub>2</sub> of the fold-change and -log<sub>10</sub> of the p-value.

538

### 539 *C. elegans immunofluorescence and imaging methods*

540 *C. elegans* gonads from 24 hour post-L4 hermaphrodites were dissected and whole-  
541 mounted on slides as in (Colaiácovo et al. 2003) using 1% paraformaldehyde fixation, or  
542 4% for the  $\alpha$ -RAD-51 time course analysis. A list of primary antibodies used in this study  
543 along with their corresponding dilutions can be found in Supplemental Table 2. Secondary  
544 antibodies were purchased from Jackson ImmunoResearch Laboratories (West Grove,  
545 PA) as AffiniPure IgG (H+L) with minimum crossreactivity:  $\alpha$ -rabbit Cy3,  $\alpha$ -goat Cy3  
546 (1:200);  $\alpha$ -chicken Alexa 488,  $\alpha$ -rabbit Alexa 488,  $\alpha$ -guinea pig Alexa 488 (1:500); and  $\alpha$ -  
547 rabbit Cy5,  $\alpha$ -goat Cy5,  $\alpha$ -guinea pig Cy5,  $\alpha$ -chicken Alexa 647 (1:100).

548 High-resolution imaging was performed with a IX-70 microscope (Olympus, MA)  
549 at 0.2 $\mu$ m Z-intervals usually dividing the gonad in 7 equally sized zones from the distal tip  
550 with a cooled CCD camera (CH350; Roper Scientific, AZ) driven by the DeltaVision  
551 Imaging System (Applied Precision, GE Healthcare). Fixed samples were imaged using  
552 a 100x objective (N.A. 1.4), 10X eyepieces, and an auxiliary magnification lens of 1.5X  
553 for imaging diakinesis oocytes. Images were deconvolved using a conservative ratio and



554 15x cycles with SoftWorx 3.3.6 software from Applied Precision, and processed with Fiji  
555 ImageJ (Schindelin et al. 2012).

556 Super-resolution imaging of 24 hour post-L4 *gras-1::gfp;sun-1::mRuby* worms was  
557 performed with an OMX 3D-Structured Illumination microscope with focus drift collection  
558 after point-spread function assessment (Nikon Imaging Center, Harvard Medical School).  
559

#### 560 *Pairing measurements*

561 Quantitative time course analysis of homologous chromosome pairing was assessed by  
562 immunostaining 24 hour post-L4 dissected gonads with  $\alpha$ -HIM-8. Gonads were divided  
563 into seven 512x512 pixel zones, with Zone 1 starting approximately three nuclear  
564 diameters away from the distal gonad tip as in (MacQueen 2001). HIM-8 foci were  
565 considered paired if  $\leq 0.75\mu\text{m}$  apart. Two independent biological replicates and a total of  
566 6 gonads were scored for each genotype. The average number of nuclei scored per zone  
567 in wild type and *gras-1* was respectively: zone 1 (n=160, 134), zone 2 (n=142, 133), zone  
568 3 (n=144, 150), zone 4 (n=157, 167), zone 5 (n=165, 178), zone 6 (n=136, 165), and zone  
569 7 (n=131, 145).

570

#### 571 *RAD-51 and ZHP-3 time course analyses*

572 Whole-mounted gonads from 24 hour post-L4 hermaphrodites immunostained either for  
573 RAD-51 or ZHP-3 were divided into seven equal-size zones with two independent  
574 biological replicates per comparison. Fiji plugin Cell Counter  
575 (<https://imagej.nih.gov/ij/plugins/cell-counter.html>) was used to track in 3D the number of  
576 foci for each nucleus in a zone. The average number of nuclei scored per zone for the

577 RAD-51 analysis was: zone 1 (n=97.8), zone 2 (n=114), zone 3 (n=115), zone 4 (115.6),  
578 zone 5 (n=113.4), zone 6 (n=108), and zone 7 (n=101.6). The number of nuclei scored in  
579 zones where ZHP-3 signal was restricted to individual foci was 72 (wild type) and 71  
580 (*gras-1*).

581

### 582 *Plate phenotyping*

583 Between 10 to 15 L4-stage hermaphrodites for each genotype were placed on individual  
584 NGM plates freshly seeded with *E. coli* OP50 to score the total numbers of eggs laid  
585 (brood size), embryonic lethality (number of unhatched eggs/total number of eggs laid),  
586 larval lethality (number of dead larvae/total number of hatched eggs) and male frequency  
587 (number of males /total number of adult worms). Individual P0 worms were moved every  
588 24 hours to new plates for four consecutive days to score entire brood sizes.

589

### 590 *RNAi by feeding*

591 Feeding RNA interference experiments were performed as in (Govindan et al. 2006) using  
592 HT115 bacteria expressing pL4440 empty vector as a control and bacteria expressing  
593 dsRNA for the gene of interest from the Ahringer RNAi library (*ima-2* F26B1.3, *dhc-1*  
594 T21E12.4) (Source Bioscience). Between three to five L4-stage worms were placed per  
595 plate (in a minimum of 2 plates per genotype per replicate) and grown at room  
596 temperature. F1 L4 animals were transferred to newly seeded RNAi plates and 24h post-  
597 L4 worms were analyzed. Alternatively, P0 L1-stage animals were placed in RNAi plates  
598 at 25°C and analyzed 24h post-L4 stage when performing *dhc-1* depletion experiments.

599

600 *Germ cell apoptosis experiments*

601 The number of germ cell corpses per gonad arm was scored in 20h post-L4 stage worms  
602 as in (Kelly et al. 2000). A minimum of 30 gonads were scored for each genotype using  
603 a Leica DM5000B fluorescence microscope.

604

605 *Bioinformatics and databases*

606 The evolutionary tree of GRAS-1 family protein members was obtained from TreeFam  
607 (2019 TF316315, Ruan et al., 2007, <http://www.treefam.org/>). Degree of conservation  
608 between CeGRAS-1 and HsCYTIP or HsGRASP was calculated using NCBI-blast  
609 (<https://blast.ncbi.nlm.nih.gov/Blast.cgi>) and NCBI-cobalt  
610 (<http://www.ncbi.nlm.nih.gov/tools/cobalt/>). PDZ domain prediction was performed using  
611 the ExPaSy Prosite tool (Sigrist et al., 2012, <http://prosite.expasy.org/>). ExPaSy-Marcoil  
612 tool was used to predict coiled-coil domains (Delorenzi and Speed, 2002, [http://bcf.isb-](http://bcf.isb-sib.ch/webmarcoil/webmarcoilC1.html)  
613 [sib.ch/webmarcoil/webmarcoilC1.html](http://bcf.isb-sib.ch/webmarcoil/webmarcoilC1.html)). *C. elegans* gene expression was assessed using  
614 NEXTDB (nematode.lab.nig.ac.jp/) and (Ortiz et al. 2014; Reinke 2004; Tzur et al. 2018).

615

616 *Chromosome movement assessment by live imaging*

617 Wild-type and *gras-1* hermaphrodites carrying the *oxls279[Ppie-1::GFP::H2B, unc +](II)*;  
618 *ieSi21 [sun-1p::sun-1::mRuby::sun-1 3'UTR + Cbr-unc-119(+)] IV* constructs were grown  
619 at 20°C or 25°C and selected at the L4 stage. 14-16h post-L4 live worms were mounted  
620 on 2% agarose pads with M9 containing 0.01% levamisole. Hyperstack images (x, y, z, t)  
621 at 594nm for SUN-1::mRuby fluorescence, were taken using the 60x or 100X objective at  
622 0.2µm intervals. Nuclei with chromatin in the crescent-shaped configuration characteristic

623 of the leptotene/zygotene stage were imaged every 5 seconds for a minute and SUN-1  
624 aggregate trajectory was followed. An additional stack (x, y, z) capturing GFP::H2B signal  
625 at 523nm was collected as a reference for the chromatin shape. Images were registered  
626 using the Fiji (NIH) plugin Manual Registration. 2D speed analysis of SUN-1::mRuby  
627 aggregates was performed using the Fiji Manual Tracking plugin as in (Alleva et al. 2017;  
628 Link et al. 2018).

629

### 630 *Ethics statement*

631 All mice used were bred at the Johns Hopkins University Bloomberg School of Public  
632 Health (JHSPH, Baltimore, MD) in accordance with criteria established by the National  
633 Institute of Health and the U.S. Department of Agriculture. The Johns Hopkins University  
634 Institutional Animal Care and Use Committee (IACUC) approved the protocols for the  
635 mice's care and use.

636

### 637 *Mice mutant lines*

638 *Tamalin* KO mice were kindly provided by Dr. Lino Tessarollo (Yanpallewar et al. 2012).  
639 We obtained mice harboring the *Cytip* tm1a “knockout first” allele from the Mutant Mouse  
640 Resource and Research Centers (MMRRC) at University of California-Davis. The *Cytip*  
641 tm1a allele has loxP sites flanking exon 4 and 5. Mice heterozygous for *Cytip* tm1a were  
642 bred with mice harboring the *Spo11-Cre* transgene (C57BL/6-Tg Spo11-cre)Rsw/PecoJ),  
643 which express Cre recombinase in spermatocytes shortly after meiotic entry (Lyndaker et  
644 al. 2013). The resulting progeny from this cross harbored the *Cytip* tm1b KO allele. We  
645 subsequently bred mice harboring the Tamalin KO and *Cytip* KO alleles to create the

646 *Tamalin*, *Cytip* DKO mice for analysis. We also bred mice heterozygous for *Cytip* tm1a  
647 allele with mice harboring FLP recombinase transgene (FLP tg/0) to produce progeny  
648 with the *Cytip* tm1c “conditional knockout” (cKO) allele. These mice were used to create  
649 the *Cytip* cKO mice that were homozygous for the *Cytip* tm1c allele and hemizygous for  
650 the *Spo11-Cre* transgene.

651

### 652 *Mouse genotyping*

653 Mouse genotypes were obtained by polymerase chain reaction (PCR). Mice toe tips were  
654 digested in 50 mM NaOH at 95°C for 15 mins and 1M Tris-HCl pH 7.5 was added to the  
655 digestion. The digested toe tips were used as the DNA template in the PCR. Primers used  
656 in the PCRs are listed in Supplemental Table 3. PCR conditions: 90°C for 2 min, 30 cycles  
657 of 90°C for 20 s, 58°C for 30 s, 72°C for 1 min. PCR products were analyzed using 2%  
658 agarose gels.

659

### 660 *Histological analysis and tubule squash preparations*

661 Testes were fixed in Bouins fixative, embedded in paraffin, and serial sections of 5- $\mu$ m  
662 thickness were placed onto slides and stained with hematoxylin and eosin (H&E). Mouse  
663 tubule squashes were prepared as described in (Wellard et al. 2018).

664

### 665 *Mouse chromatin spread preparations and imaging*

666 Spermatoocyte and oocyte chromatin spreads were prepared as previously described  
667 (Jordan et al., 2012; Wellard et al. 2022; Hwang et al. 2018). Primary antibodies and dilution

668 used for immunolabeling are presented in Supplemental Table 4. Secondary antibodies  
669 against human, rabbit, rat, mouse, and guinea pig IgG and conjugated to Alexa 350, 488,  
670 568, or 633 (Life Technologies) were used at a 1:500 dilution.

671 Images from chromatin spread preparations were captured using a Zeiss  
672 CellObserver Z1 microscope linked to an ORCA-Flash 4.0 CMOS camera (Hamamatsu).  
673 Testis sections stained with H&E staining were captured using a Zeiss Axiolmager A2  
674 microscope linked to an AxioCam ERc5s camera, or Keyence BZ-X800 fluorescence  
675 microscope. Images were analyzed and processed using ZEN 2012 blue edition imaging  
676 software (Zeiss) or with BZ-X800 Viewer and Analyzer software (Keyence).

677

#### 678 *Statistical methods*

679 The average of the data was used as a typical representation throughout the manuscript,  
680 accompanied by the standard error as a measure of data deviation. Statistical tests were  
681 performed in GraphPad Prism 8. Variables with continuous data, such as speed, distance,  
682 and area, were compared using unpaired 2-tailed t-tests. The Fisher exact test was used  
683 to assess the statistical significance for the distribution of data in the samples. All other  
684 comparisons were tested using the two-sided non-parametric Mann Whitney U-test.  
685 Graphs for comparisons were generated in Microsoft Excel or GraphPad Prism 8.

686

#### 687 **Competing Interest Statement**

688 The authors declare no competing interests.

689

## 690 **Acknowledgments**

691 Some worm strains were kindly provided by the Caenorhabditis Genetics Center. We  
692 thank Dr. Lino Tessarollo for providing the *Tamalin* mutant mice, Justin Ruiz for technical  
693 support, Dr. Verena Jantsch for the  $\alpha$ -pSer8 SUN-1 antibody, and Dr. Monique Zetka for  
694 the  $\alpha$ -HIM-3 and  $\alpha$ -HTP-3 antibodies, and members of the Colaiacovo laboratory for  
695 critical reading of this manuscript. This work was supported by National Institutes of  
696 Health grant R01GM072551 to M.P.C.

697

## 698 **Author Contributions**

699 M.M.-G., P.R.N., P.W.J., and M.P.C conceived the study. M.M.-G., P.R.N., M.W.S.,  
700 K.A.B., S.N., N.S., C.G.S.-G., T.T.S., S.B.-S., A.C., and S.P., performed the experiments.  
701 M.M.-G, P.R.N., M.W.S., and A.C., analyzed the data. M.M.-G., P.W.J., and M.P.C. wrote  
702 the original draft of the manuscript. M.M.-G., P.R.N., C.G.S.-G., T.T.S, A.C., E.M.-P.,  
703 P.W.J. and M.P.C. reviewed and edited the manuscript. M.P.C. acquired the funding.  
704 P.W.J. and M.P.C. supervised the study. All authors read, reviewed, and approved the  
705 manuscript.

706

## 707 **REFERENCES**

- 708 Alexandru G, Uhlmann F, Mechtler K, Poupart MA, Nasmyth K. 2001. Phosphorylation of the  
709 cohesin subunit Scc1 by Polo/Cdc5 kinase regulates sister chromatid separation in  
710 yeast. *Cell* **105**: 459–472.
- 711 Alleva B, Balukoff N, Peiper A, Smolikove S. 2017. Regulating chromosomal movement by the  
712 cochaperone FKB-6 ensures timely pairing and synapsis. *Journal of Cell Biology* **216**:  
713 393–408.

- 714 Alpi A, Pasierbek P, Gartner A, Loidl J. 2003. Genetic and cytological characterization of the  
715 recombination protein RAD-51 in *Caenorhabditis elegans*. *Chromosoma* **112**: 6–16.
- 716 Attar MA, Santy LC. 2013. The scaffolding protein GRASP/Tamalin directly binds to Dock180 as  
717 well as to cytohesins facilitating GTPase crosstalk in epithelial cell migration. *BMC Cell*  
718 *Biol* **14**: 9.
- 719 Bhalla N, Wynne DJ, Jantsch V, Dernburg AF. 2008. ZHP-3 acts at crossovers to couple meiotic  
720 recombination with synaptonemal complex disassembly and bivalent formation in *C.*  
721 *elegans*. *PLoS Genet* **4**: e1000235.
- 722 Bowman R, Balukoff N, Ford T, Smolikove S. 2019. A novel role for  $\alpha$ -importins and Akirin in  
723 establishment of meiotic sister chromatid cohesion in *Caenorhabditis elegans*. *Genetics*  
724 **211**: 617–635.
- 725 Brenner S. 1974. The genetics of *Caenorhabditis elegans*. *Genetics* **77**: 71–94.
- 726 Castellano-Pozo M, Pacheco S, Sioutas G, Jaso-Tamame AL, Dore MH, Karimi MM, Martinez-  
727 Perez E. 2020. Surveillance of cohesin-supported chromosome structure controls  
728 meiotic progression. *Nat Commun* **11**: 4345.
- 729 Ceulemans H, Bollen M. 2004. Functional diversity of protein phosphatase-1, a cellular  
730 economizer and reset button. *Physiol Rev* **84**: 1–39.
- 731 Cohen-Fix O, Askjaer P. 2017. Cell Biology of the *Caenorhabditis elegans* Nucleus. *Genetics*  
732 **205**: 25–59.
- 733 Colaiácovo MP, MacQueen AJ, Martinez-Perez E, McDonald K, Adamo A, La Volpe A,  
734 Villeneuve AM. 2003. Synaptonemal complex assembly in *C. elegans* is dispensable for  
735 loading strand-exchange proteins but critical for proper completion of recombination.  
736 *Dev Cell* **5**: 463–474.
- 737 Coppola V, Barrick CA, Bobisse S, Rodriguez-Galan MC, Pivetta M, Reynolds D, Howard OMZ,  
738 Palko ME, Esteban PF, Young HA, et al. 2006. The scaffold protein Cybr is required for  
739 cytokine-modulated trafficking of leukocytes *in vivo*. *Mol Cell Biol* **26**: 5249–5258.
- 740 Delorenzi M, Speed T. 2002. An HMM model for coiled-coil domains and a comparison with  
741 PSSM-based predictions. *Bioinformatics* **18**: 617–625.
- 742 Dernburg AF, McDonald K, Moulder G, Barstead R, Dresser M, Villeneuve AM. 1998. Meiotic  
743 recombination in *C. elegans* initiates by a conserved mechanism and is dispensable for  
744 homologous chromosome synapsis. *Cell* **94**: 387–398.
- 745 Frøkjær-Jensen C, Wayne Davis M, Hopkins CE, Newman BJ, Thummel JM, Olesen S-P,  
746 Grunnet M, Jorgensen EM. 2008. Single-copy insertion of transgenes in *Caenorhabditis*  
747 *elegans*. *Nat Genet* **40**: 1375–1383.
- 748 Gao J, Kim H-M, Elia AE, Elledge SJ, Colaiácovo MP. 2015. NatB domain-containing CRA-1  
749 antagonizes hydrolase ACER-1 linking Acetyl-CoA metabolism to the initiation of  
750 recombination during *C. elegans* meiosis. *PLoS Genet* **11**: e1005029.



- 751 Gartner A, Milstein S, Ahmed S, Hodgkin J, Hengartner MO. 2000. A conserved checkpoint  
752 pathway mediates DNA damage-induced apoptosis and cell cycle arrest in *C. elegans*.  
753 *Mol Cell* **5**: 435–443.
- 754 Goodyer W, Kaitna S, Couteau F, Ward JD, Boulton SJ, Zetka M. 2008. HTP-3 links DSB  
755 formation with homolog pairing and crossing over during *C. elegans* meiosis.  
756 *Developmental Cell* **14**: 263–274.
- 757 Govindan JA, Cheng H, Harris JE, Greenstein D. 2006. Galphao/i and Galphas signaling  
758 function in parallel with the MSP/Eph receptor to control meiotic diapause in *C. elegans*.  
759 *Curr Biol* **16**: 1257–1268.
- 760 Heppert JK, Pani AM, Roberts AM, Dickinson DJ, Goldstein B. 2018. A CRISPR tagging-based  
761 screen reveals localized players in Wnt-directed asymmetric cell division. *Genetics* **208**:  
762 1147–1164.
- 763 Heufler C, Ortner D, Hofer S. 2008. Cybr, CYTIP or CASP: an attempt to pinpoint a molecule's  
764 functions and names. *Immunobiology* **213**: 729–732.
- 765 Hillers KJ, Jantsch V, Martinez-Perez E, Yanowitz JL. 2017. Meiosis. *WormBook* **2017**: 1–43.
- 766 Hornig NCD, Uhlmann F. 2004. Preferential cleavage of chromatin-bound cohesin after targeted  
767 phosphorylation by Polo-like kinase. *EMBO J* **23**: 3144–3153.
- 768 Jantsch-Plunger V, Glotzer M. 1999. Depletion of syntaxins in the early *Caenorhabditis elegans*  
769 embryo reveals a role for membrane fusion events in cytokinesis. *Curr Biol* **9**: 738–745.
- 770 Kelly KO, Dernburg AF, Stanfield GM, Villeneuve AM. 2000. *Caenorhabditis elegans msh-5* is  
771 required for both normal and radiation-induced meiotic crossing over but not for  
772 completion of meiosis. *Genetics* **156**: 617–630.
- 773 Kim H, Colaiácovo MP. 2019. CRISPR-Cas9-guided genome engineering in *C. elegans*. *Current*  
774 *Protocols in Molecular Biology* **129(1)**: e106.
- 775 Kitano J, Kimura K, Yamazaki Y, Soda T, Shigemoto R, Nakajima Y, Nakanishi S. 2002.  
776 Tamalin, a PDZ domain-containing protein, links a protein complex formation of group 1  
777 metabotropic glutamate receptors and the guanine nucleotide exchange factor  
778 cytohesins. *J Neurosci* **22**: 1280–1289.
- 779 Kohara Y. 2001. [Systematic analysis of gene expression of the *C. elegans* genome].  
780 *Tanpakushitsu Kakusan Koso* **46**: 2425–2431.
- 781 Labella S, Woglar A, Jantsch V, Zetka M. 2011. Polo kinases establish links between meiotic  
782 chromosomes and cytoskeletal forces essential for homolog pairing. *Dev Cell* **21**: 948–  
783 958.
- 784 Labrador L, Barroso C, Lightfoot J, Müller-Reichert T, Flibotte S, Taylor J, Moerman DG,  
785 Villeneuve AM, Martinez-Perez E. 2013. Chromosome movements promoted by the  
786 mitochondrial protein SPD-3 are required for homology search during *Caenorhabditis*  
787 *elegans* meiosis. *PLoS Genet* **9**: e1003497.

- 788 Lake CM, Hawley RS. 2021. Synaptonemal complex. *Current Biology* **31**: R225–R227.
- 789 Láscares-Lagunas L, Martínez-García M, Colaiácovo M. 2020. SnapShot: Meiosis – Prophase I.  
790 *Cell* **181**: 1442-1442.e1.
- 791 Link J, Jantsch V. 2019. Meiotic chromosomes in motion: a perspective from *Mus musculus* and  
792 *Caenorhabditis elegans*. *Chromosoma*. **128(3)**:317-330.
- 793 Link J, Paouneskou D, Velkova M, Daryabeigi A, Laos T, Labella S, Barroso C, Pacheco Piñol  
794 S, Montoya A, Kramer H, et al. 2018. Transient and partial nuclear lamina disruption  
795 promotes chromosome movement in early meiotic prophase. *Developmental Cell* **45**:  
796 212-225.e7.
- 797 Lyndaker AM, Lim PX, Mleczko JM, Diggins CE, Holloway JK, Holmes RJ, Kan R, Schlafer DH,  
798 Freire R, Cohen PE, et al. 2013. Conditional inactivation of the DNA damage response  
799 gene Hus1 in mouse testis reveals separable roles for components of the RAD9-RAD1-  
800 HUS1 complex in meiotic chromosome maintenance. *PLoS Genet* **9**: e1003320.
- 801 MacQueen AJ. 2001. Nuclear reorganization and homologous chromosome pairing during  
802 meiotic prophase require *C. elegans* *chk-2*. *Genes & Development* **15**: 1674–1687.
- 803 Mainpal R, Priti A, Subramaniam K. 2011. PUF-8 suppresses the somatic transcription factor  
804 PAL-1 expression in *C. elegans* germline stem cells. *Developmental Biology* **360**: 195–  
805 207.
- 806 McGee MD, Stagljar I, Starr DA. 2009. KDP-1 is a nuclear envelope KASH protein required for  
807 cell-cycle progression. *Journal of Cell Science* **122**: 2895–2905.
- 808 Nadarajan S, Lambert TJ, Altendorfer E, Gao J, Blower MD, Waters JC, Colaiácovo MP. 2017.  
809 Polo-like kinase-dependent phosphorylation of the synaptonemal complex protein SYP-4  
810 regulates double-strand break formation through a negative feedback loop. *eLife* **6**:  
811 e23437.
- 812 Nadarajan S, Mohideen F, Tzur YB, Ferrandiz N, Crawley O, Montoya A, Faull P, Snijders AP,  
813 Cutillas PR, Jambhekar A, et al. 2016. The MAP kinase pathway coordinates crossover  
814 designation with disassembly of synaptonemal complex proteins during meiosis. *eLife* **5**:  
815 e12039
- 816 Nevriy DJ, Peterson VJ, Avram D, Ishmael JE, Hansen SG, Dowell P, Hruby DE, Dawson MI,  
817 Leid M. 2000. Interaction of GRASP, a protein encoded by a novel retinoic acid-induced  
818 gene, with members of the cytohesin family of guanine nucleotide exchange factors.  
819 *Journal of Biological Chemistry* **275**: 16827–16836.
- 820 Nishi Y, Rogers E, Robertson SM, Lin R. 2008. Polo kinases regulate *C. elegans* embryonic  
821 polarity via binding to DYRK2-primed MEX-5 and MEX-6. *Development* **135**: 687–697.
- 822 Ortiz MA, Noble D, Sorokin EP, Kimble J. 2014. A new dataset of spermatogenic vs. oogenic  
823 transcriptomes in the nematode *Caenorhabditis elegans*. *G3 (Bethesda)* **4**: 1765–1772.
- 824 Palacios V, Kimble GC, Tootle TL, Buszczak M. 2021. Importin-9 regulates chromosome  
825 segregation and packaging in *Drosophila* germ cells. *J Cell Sci* **134**: jcs258391.

- 826 Pérez-Palma E, May P, Iqbal S, Niestroj L-M, Du J, Heyne HO, Castrillon JA, O'Donnell-Luria A,  
827 Nürnberg P, Palotie A, et al. 2020. Identification of pathogenic variant enriched regions  
828 across genes and gene families. *Genome Res* **30**: 62–71.
- 829 Phillips CM, Wong C, Bhalla N, Carlton PM, Weiser P, Meneely PM, Dernburg AF. 2005. HIM-8  
830 binds to the X chromosome pairing center and mediates chromosome-specific meiotic  
831 synapsis. *Cell* **123**: 1051–1063.
- 832 Reinke V. 2004. Genome-wide germline-enriched and sex-biased expression profiles in  
833 *Caenorhabditis elegans*. *Development* **131**: 311–323.
- 834 Robin G, DeBonis S, Dornier A, Cappello G, Ebel C, Wade RH, Thierry-Mieg D, Kozielski F.  
835 2005. Essential kinesins: characterization of *Caenorhabditis elegans* KLP-15.  
836 *Biochemistry* **44**: 6526–6536.
- 837 Rog O, Dernburg AF. 2015. Direct visualization reveals kinetics of meiotic chromosome  
838 synapsis. *Cell Reports* **10**: 1639–1645.
- 839 Rohožková J, Hůlková L, Fukalová J, Flachs P, Hozák P. 2019. Pairing of homologous  
840 chromosomes in *C. elegans* meiosis requires DEB-1 - an orthologue of mammalian  
841 vinculin. *Nucleus* **10**: 93–115.
- 842 Ruan J, Li H, Chen Z, Coghlan A, Coin LJM, Guo Y, Heriche J-K, Hu Y, Kristiansen K, Li R, et  
843 al. 2007. TreeFam: 2008 Update. *Nucleic Acids Research* **36**: D735–D740.
- 844 Saito TT, Mohideen F, Meyer K, Harper JW, Colaiácovo MP. 2012. SLX-1 is required for  
845 maintaining genomic integrity and promoting meiotic noncrossovers in the  
846 *Caenorhabditis elegans* germline. *PLoS Genetics* **8**: e1002888.
- 847 Saito TT, Youds JL, Boulton SJ, Colaiácovo MP. 2009. *Caenorhabditis elegans* HIM-18/SLX-4  
848 interacts with SLX-1 and XPF-1 and maintains genomic integrity in the germline by  
849 processing recombination intermediates. *PLoS Genet* **5**: e1000735.
- 850 Sato A, Isaac B, Phillips CM, Rillo R, Carlton PM, Wynne DJ, Kasad RA, Dernburg AF. 2009.  
851 Cytoskeletal forces span the nuclear envelope to coordinate meiotic chromosome  
852 pairing and synapsis. *Cell* **139**: 907–919.
- 853 Sato M, Grant BD, Harada A, Sato K. 2008. Rab11 is required for synchronous secretion of  
854 chondroitin proteoglycans after fertilization in *Caenorhabditis elegans*. *Journal of Cell*  
855 *Science* **121**: 3177–3186.
- 856 Schild-Prüfert K, Saito TT, Smolikov S, Gu Y, Hincapie M, Hill DE, Vidal M, McDonald K,  
857 Colaiácovo MP. 2011. Organization of the synaptonemal complex during meiosis in  
858 *Caenorhabditis elegans*. *Genetics* **189**: 411–421.
- 859 Schindelin J, Arganda-Carreras I, Frise E, Kaynig V, Longair M, Pietzsch T, Preibisch S,  
860 Rueden C, Saalfeld S, Schmid B, et al. 2012. Fiji: an open-source platform for biological-  
861 image analysis. *Nat Methods* **9**: 676–682.
- 862 Siddiqui SS. 2002. Metazoan motor models: kinesin superfamily in *C. elegans*. *Traffic* **3**: 20–28.

- 863 Sigrist CJA, de Castro E, Cerutti L, Cucho BA, Hulo N, Bridge A, Bougueleret L, Xenarios I.  
864 2012. New and continuing developments at PROSITE. *Nucleic Acids Research* **41**:  
865 D344–D347.
- 866 Silva-García CG, Lanjuin A, Heintz C, Dutta S, Clark NM, Mair WB. 2019. Single-copy knock-in  
867 loci for defined gene expression in *Caenorhabditis elegans*. *G3* **9**: 2195–2198.
- 868 Smolikov S, Eizinger A, Hurlburt A, Rogers E, Villeneuve AM, Colaiácovo MP. 2007a. Synapsis-  
869 defective mutants reveal a correlation between chromosome conformation and the mode  
870 of double-strand break repair during *Caenorhabditis elegans* meiosis. *Genetics* **176**:  
871 2027–2033.
- 872 Smolikov S, Eizinger A, Schild-Prufert K, Hurlburt A, McDonald K, Engebrecht J, Villeneuve AM,  
873 Colaiácovo MP. 2007b. SYP-3 restricts synaptonemal complex assembly to bridge  
874 paired chromosome axes during meiosis in *Caenorhabditis elegans*. *Genetics* **176**:  
875 2015–2025.
- 876 Smolikov S, Schild-Prüfert K, Colaiácovo MP. 2009. A yeast two-hybrid screen for SYP-3  
877 interactors identifies SYP-4, a component required for synaptonemal complex assembly  
878 and chiasma formation in *Caenorhabditis elegans* meiosis. *PLoS Genetics* **5**: e1000669.
- 879 Sung P. 1994. Catalysis of ATP-dependent homologous DNA pairing and strand exchange by  
880 yeast RAD51 protein. *Science* **265**: 1241–1243.
- 881 Teuliere J, Cordes S, Singhvi A, Talavera K, Garriga G. 2014. Asymmetric neuroblast divisions  
882 producing apoptotic cells require the cytohesin GRP-1 in *Caenorhabditis elegans*.  
883 *Genetics* **198**: 229–247.
- 884 Tzur YB, Eglydio de Carvalho C, Nadarajan S, Van Bostelen I, Gu Y, Chu DS, Cheeseman IM,  
885 Colaiácovo MP. 2012. LAB-1 targets PP1 and restricts Aurora B kinase upon entrance  
886 into meiosis to promote sister chromatid cohesion. *PLoS Biol* **10**: e1001378.
- 887 Tzur YB, Friedland AE, Nadarajan S, Church GM, Calarco JA, Colaiácovo MP. 2013. Heritable  
888 custom genomic modifications in *Caenorhabditis elegans* via a CRISPR-Cas9 system.  
889 *Genetics* **195**: 1181–1185.
- 890 Tzur YB, Winter E, Gao J, Hashimshony T, Yanai I, Colaiácovo MP. 2018. Spatiotemporal gene  
891 expression analysis of the *Caenorhabditis elegans* germline uncovers a syncytial  
892 expression switch. *Genetics* **210**: 587–605.
- 893 Uhlén M, Fagerberg L, Hallström BM, Lindskog C, Oksvold P, Mardinoglu A, Sivertsson Å,  
894 Kampf C, Sjöstedt E, Asplund A, et al. 2015. Tissue-based map of the human proteome.  
895 *Science* **347**: 1260419.
- 896 Walhout AJM, Vidal M. 2001. High-throughput yeast two-hybrid assays for large-scale protein  
897 interaction mapping. *Methods* **24**: 297–306.
- 898 Webster A, Schuh M. 2017. Mechanisms of aneuploidy in human eggs. *Trends Cell Biol* **27**: 55–  
899 68.

- 900 Wellard SR, Hopkins J, Jordan PW. 2018. A seminiferous tubule squash technique for the  
901 cytological analysis of spermatogenesis using the mouse model. *JoVE* 56453.
- 902 Woglar A, Daryabeigi A, Adamo A, Habacher C, Machacek T, La Volpe A, Jantsch V. 2013.  
903 Matefin/SUN-1 phosphorylation is part of a surveillance mechanism to coordinate  
904 chromosome synapsis and recombination with meiotic progression and chromosome  
905 movement. *PLoS Genet* **9**: e1003335.
- 906 Wynne DJ, Rog O, Carlton PM, Dernburg AF. 2012. Dynein-dependent processive chromosome  
907 motions promote homologous pairing in *C. elegans* meiosis. *Journal of Cell Biology* **196**:  
908 47–64.
- 909 Yanpallewar SU, Barrick CA, Palko ME, Fulgenzi G, Tessarollo L. 2012. Tamalin is a critical  
910 mediator of electroconvulsive shock-induced adult neuroplasticity. *Journal of*  
911 *Neuroscience* **32**: 2252–2262.
- 912 Yuan J, Shaham S, Ledoux S, Ellis HM, Horvitz HR. 1993. The *C. elegans* cell death gene *ced-*  
913 *3* encodes a protein similar to mammalian interleukin-1 beta-converting enzyme. *Cell* **75**:  
914 641–652.
- 915 Zetka M, Paouneskou D, Jantsch V. 2020. The nuclear envelope, a meiotic jack-of-all-trades.  
916 *Current Opinion in Cell Biology* **64**: 34–42.
- 917 Zhang L, Ward JD, Cheng Z, Dernburg AF. 2015. The auxin-inducible degradation (AID) system  
918 enables versatile conditional protein depletion in *C. elegans*. *Development* **142**: 4374–  
919 4384.
- 920 Zickler D, Kleckner N. 2015. Recombination, pairing, and synapsis of homologs during meiosis.  
921 *Cold Spring Harb Perspect Biol* **7**: a016626.
- 922 Zybailov B, Mosley AL, Sardi ME, Coleman MK, Florens L, Washburn MP. 2006. Statistical  
923 analysis of membrane proteome expression changes in *Saccharomyces cerevisiae*. *J*  
924 *Proteome Res* **5**: 2339–2347.

925

## 926 FIGURES

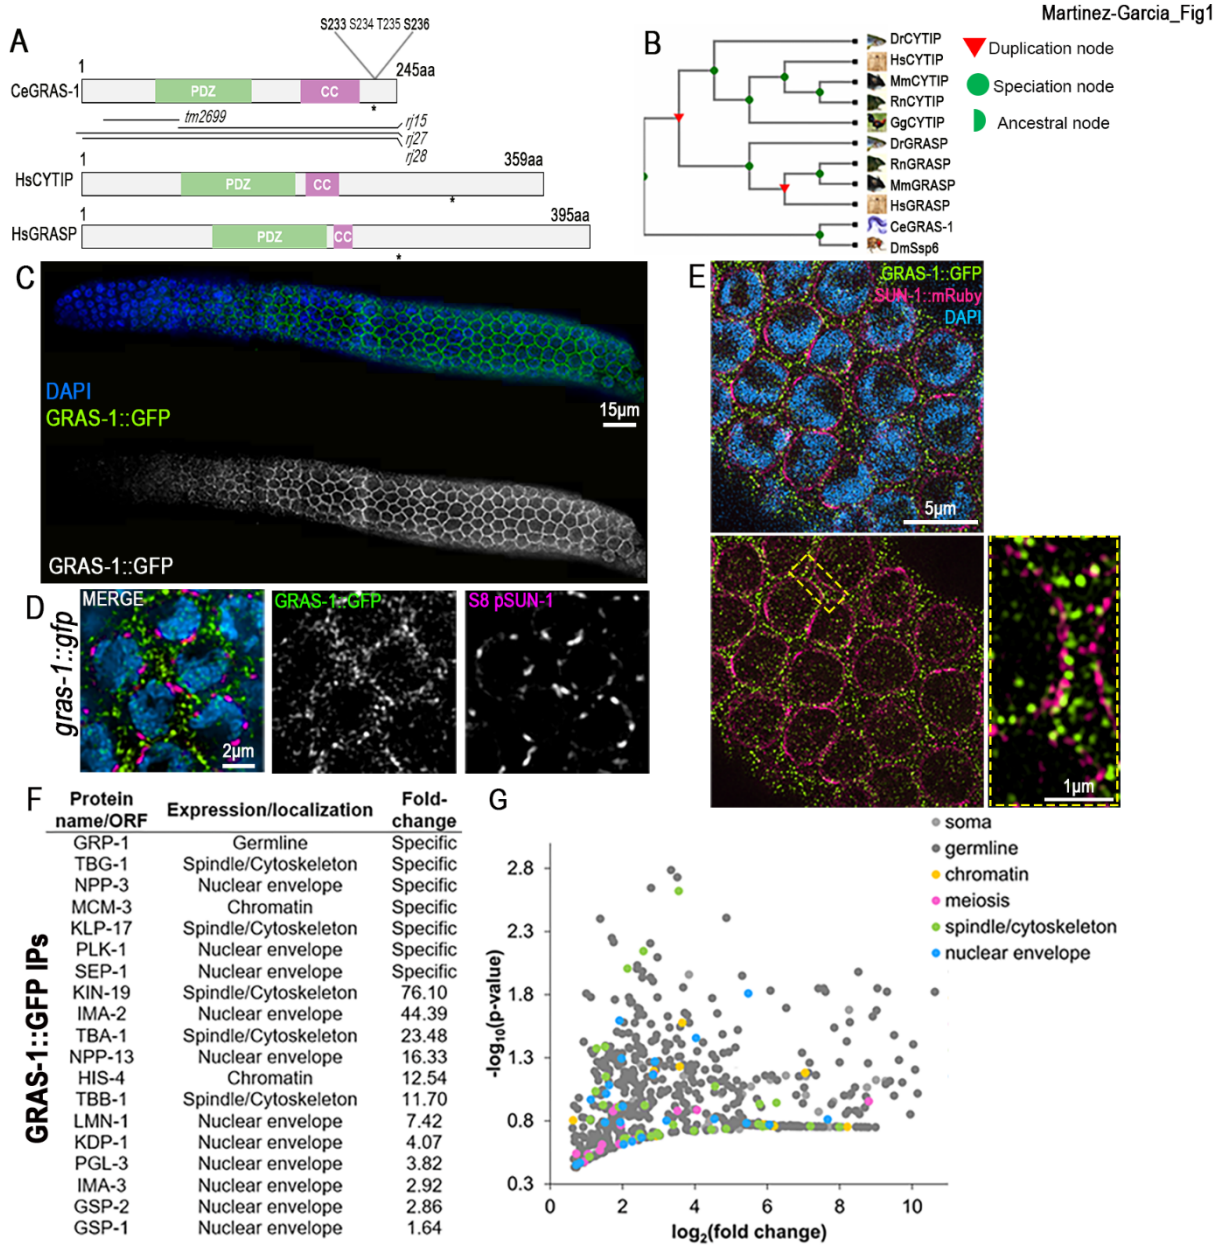

927

928

929 **Fig. 1. GRAS-1 localization is meiosis-specific and contacts NE components. (A)**

930 Protein conservation between *C. elegans* (Ce) GRAS-1 and *Homo sapiens* (Hs) CYTIP

931 and GRASP. PDZ: PSD-95/SAP90, Discs-large and ZO-1, CC: coiled-coil, asterisk

932 indicates position of predicted phosphorylation sites. **(B)** Evolutionary tree (TreeFam) of

933 GRAS-1 orthologs in *Drosophila melanogaster*, *Mus musculus* (Mm), *Rattus norvegicus*

934 (Rn), *Danio rerio* (Dr), *Gallus* (Gg). **(C)** GRAS-1::GFP localization in hermaphrodite

935 gonads co-stained with anti-GFP (green) and DAPI (blue). **(D)** Higher magnification

936 images of leptotene/zygotene stage nuclei co-stained with anti-GFP for GRAS-1::GFP

937 (green), anti-S8 pSUN-1 (magenta) and DAPI (blue). **(E)** Super-resolution microscopy

938 image of *gras-1::gfp* leptotene/zygotene nuclei co-stained for GRAS-1::GFP (green),

939 SUN-1::mRuby (magenta) and DAPI. Dashed rectangle indicates region of the nuclear

940 margins shown at higher magnification. **(F)** GRAS-1 interacting proteins.

941 Immunoprecipitation from GRAS-1::GFP whole worm extracts was analyzed by mass

942 spectrometry analysis. Their localization and enrichment in the MS samples compared to

943 controls are shown. **(G)** Volcano plot depicting all MS analysis hits above a 1.5 fold-

944 change in GRAS-1::GFP samples compared to controls (x axis), their statistical

945 significance (y axis) and colored by their described expression/localization in *C. elegans*.

946

Martinez-Garcia\_Fig2

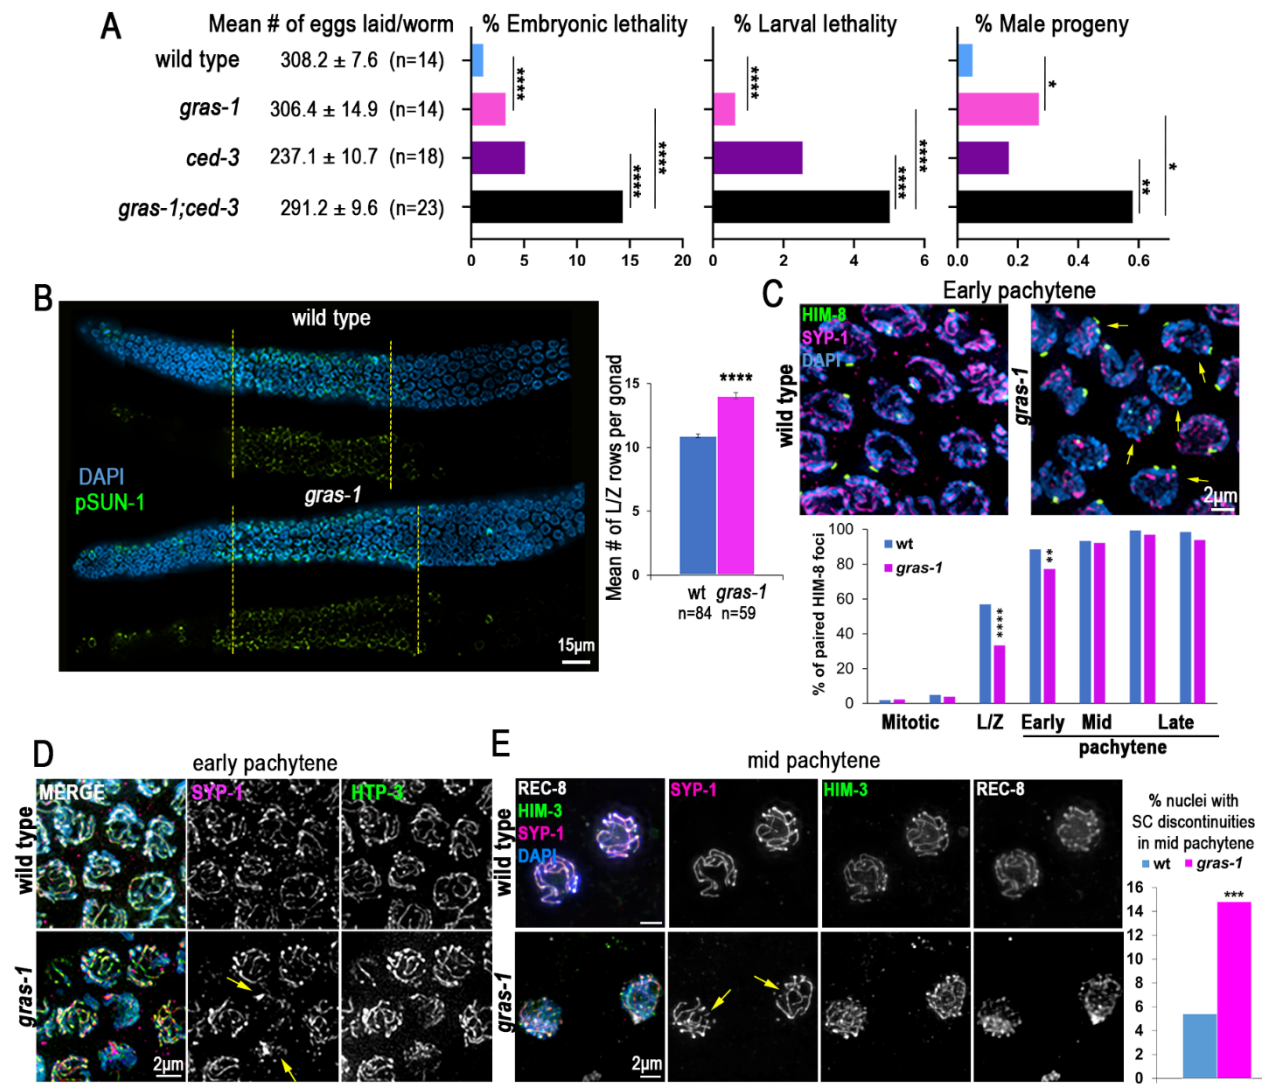

947

948



949 **Fig. 2. GRAS-1 is required for normal meiotic progression, chromosome pairing,**  
950 **and synapsis. (A)** Mean number of eggs laid (brood size)  $\pm$  SEM, the percentage of  
951 embryonic lethality, larval lethality, and male progeny are shown for the indicated  
952 genotypes. \* $p < 0.05$ , \*\* $p = 0.0037$ , \*\*\*\* $p < 0.0001$  by Fisher's exact test.  $n =$  number of P0  
953 worms analyzed from three independent biological replicates. **(B)** Whole mounted gonads  
954 of wild type and *gras-1* worms co-stained with anti-S8 pSUN-1 (green) and DAPI (blue).  
955 Both merged and S8 pSUN-1 signal only are shown with yellow dotted lines delimiting the  
956 region in which complete rows of nuclei presented S8 pSUN-1 signal;  $n = 30$  gonads each.  
957 Graph on the right shows the mean number of nuclei in leptotene/zygotene (L/Z) stage  
958 per gonad in wild type and *gras-1* worms. \*\*\*\* $p < 0.0001$  by the Mann-Whitney U-test,  $n =$   
959 number of worms analyzed from at least 2 independent biological replicates. **(C)** Top,  
960 high-resolution images of early pachytene nuclei co-stained with anti-HIM-8 (green), anti-  
961 SYP-1 (magenta) and DAPI (blue) from wild type and *gras-1* worms. Yellow arrows  
962 indicate nuclei with unpaired HIM-8 signal. Bottom, percentage of nuclei with paired HIM-  
963 8 signals ( $\leq 0.75 \mu\text{m}$  apart) at different germline stages. \*\*\*\* $p < 0.0001$ , \*\* $p = 0.008$  by the  
964 Fisher's Exact Test;  $n = 6$  gonads each and a minimum of 131 nuclei per zone. **(D)** High-  
965 resolution images of wild type and *gras-1* early pachytene nuclei ( $n = 80$  and  $50$ ,  
966 respectively) from whole mounted gonads co-stained with anti-SYP-1 (magenta), anti-  
967 HTP-3 (green) and DAPI (blue). Yellow arrows indicate nuclei with SYP-1 aggregates.  
968 **(E)** Left, high-resolution images of lightly squashed gonads of wild type and *gras-1* mid  
969 pachytene nuclei co-stained with anti-SYP-1 (magenta), anti-HIM-3 (green), anti-REC-8  
970 (white) and DAPI (blue). Right, percentage of mid-pachytene nuclei with SC

971 discontinuities in wild type and *gras-1* gonads. \*\*\* $p=0.0032$ , Fisher's Exact test,  $n=253$   
972 and 217, respectively, from two biological replicates.

973

974

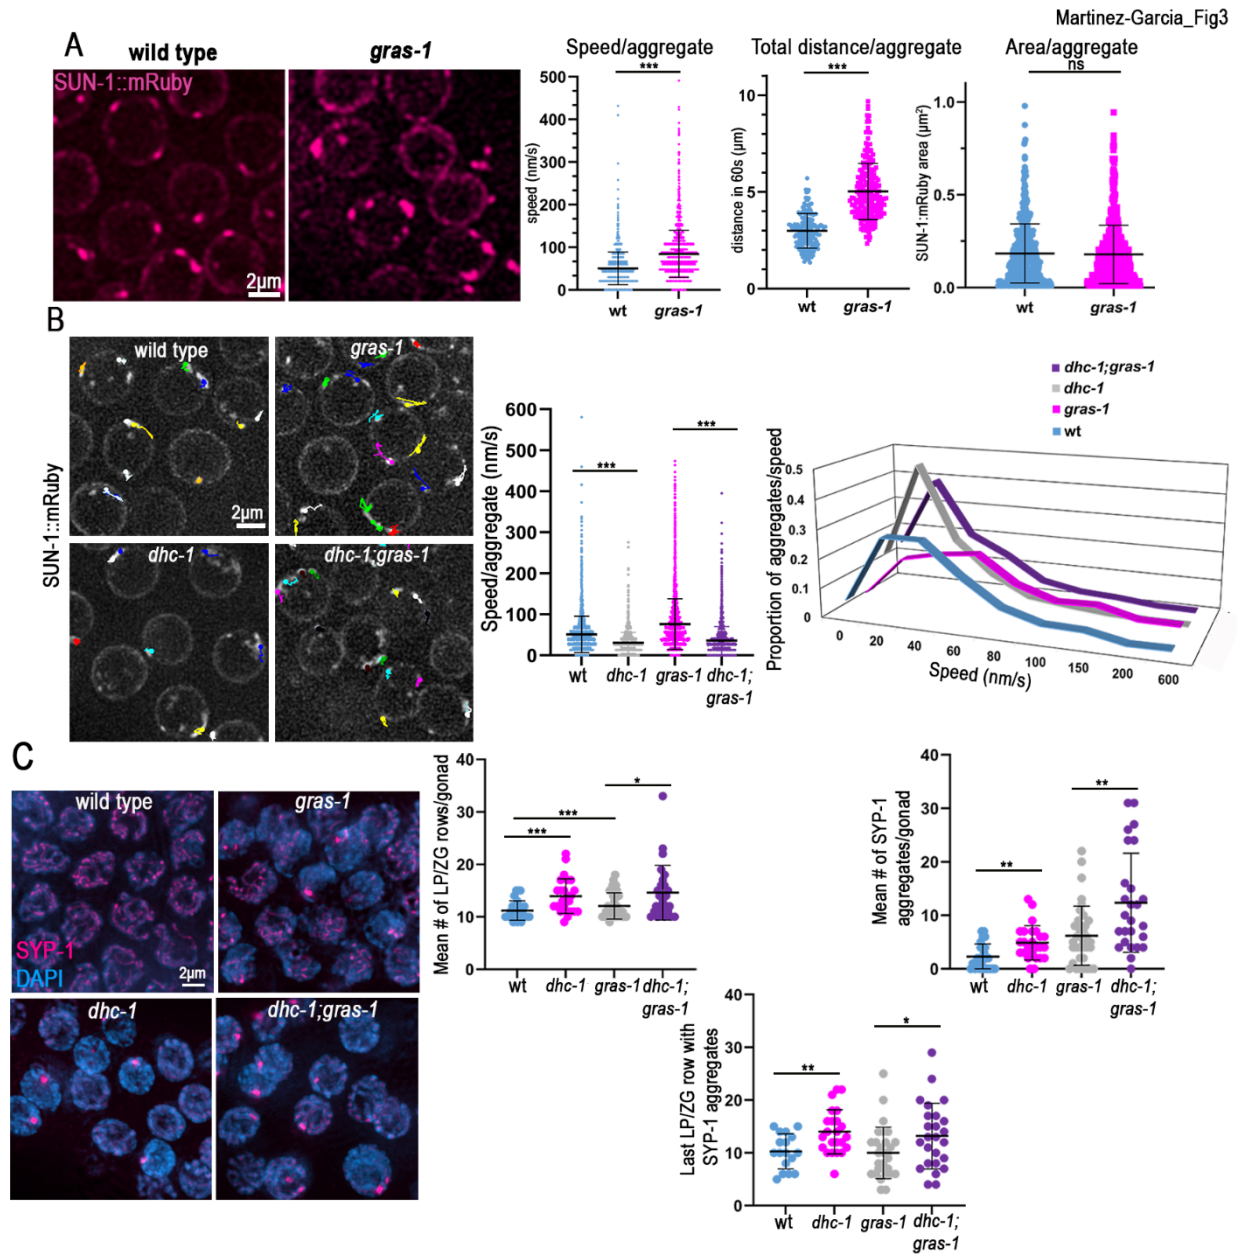

975

976

977 **Fig. 3. Chromosome movement is limited by GRAS-1 in a dynein-dependent**  
978 **manner during early prophase I. (A)** Left, snapshots of SUN-1::mRuby live imaging  
979 signal (magenta) in wild type and *gras-1* leptotene/zygotene nuclei. Right, dot plots  
980 showing the speed (nm/s) of SUN-1::mRuby aggregates, their total distance ( $\mu\text{m}$ ) traveled  
981 in 60s, and their area ( $\mu\text{m}^2$ ). \*\*\* $p < 0.001$ , ns: not significant, by Student's t-test.  $n = 173$   
982 and 220 aggregates for wild type and *gras-1* for speed and distance and  $n = 529$  and 617  
983 for the area measurement, respectively, from two independent biological repeats. **(B)** Left,  
984 snapshots from live imaging of SUN-1::mRuby aggregates showing the paths they  
985 travelled in 60s in wild type, *gras-1*, *dhc-1* and *dhc-1;gras-1* leptotene/zygotene nuclei.  
986 Right, dot plot displaying the speed (nm/s) of SUN-1::mRuby aggregates and the  
987 distribution graph of the aggregates per speed per genotype. \*\*\* $p < 0.0001$ , Student's t-  
988 test,  $n = 325, 326, 244,$  and 377 aggregates, respectively, from between 10 to 13 gonads  
989 each, from four independent biological repeats. **(C)** Left, high-resolution images of early  
990 pachytene nuclei from wild type, *gras-1*, *dhc-1*, and *dhc-1;gras-1* co-stained with anti-  
991 SYP-1 (magenta) and DAPI (blue). Right top, dot plots displaying the number of rows with  
992 nuclei at the leptotene/zygotene (LP/ZG) stage per gonad and the mean number of nuclei  
993 with SYP-1 aggregates per gonad ( $n = 26, 25, 36$  and 26 gonads, respectively). Right  
994 bottom, dot plot showing the last row of nuclei with SYP-1 aggregates per gonad ( $n = 17,$   
995 23, 29 and 25, respectively). \* $p < 0.05$ , \*\* $p < 0.01$ , \*\*\* $p < 0.001$  by the Mann-Whitney U-test.  
996 Bars show the mean and standard deviation in all graphs.

997

998

999

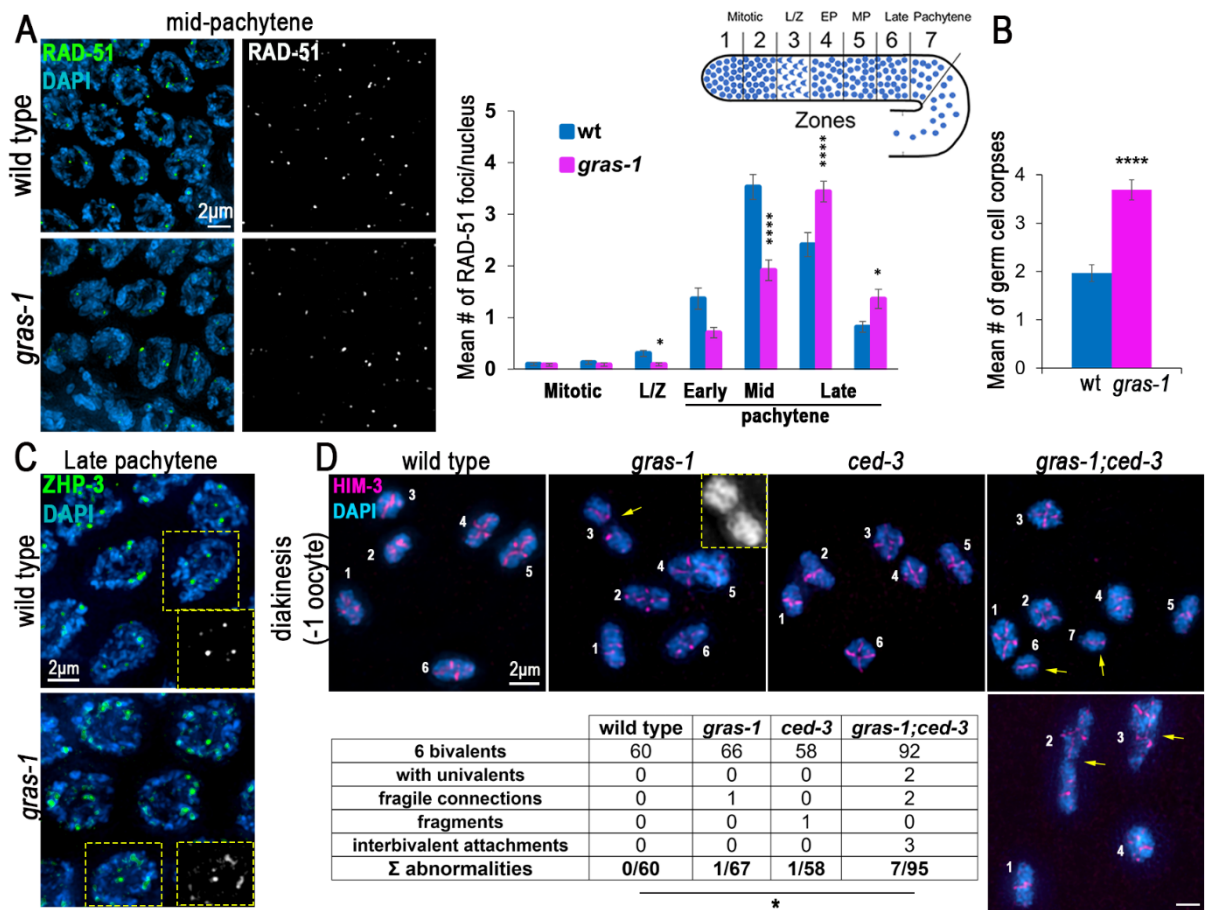

1000

1001

1002 **Fig. 4. GRAS-1 contributes to normal meiotic DSB repair progression. (A)** Left, high-  
1003 resolution images of wild type and *gras-1* mid-pachytene nuclei co-stained with anti-RAD-  
1004 51 (green) and DAPI (blue). Right, Histogram showing the mean number of RAD-51  
1005 foci/nucleus scored along the indicated zones in the germlines of wild type and *gras-1*  
1006 worms. 3 gonads were scored per genotype and >66 nuclei per zone in two independent  
1007 biological replicates. Error bars represent the SEM. \* $p < 0.05$ , \*\*\*\* $p < 0.0001$  by the Mann-  
1008 Whitney U-test. **(B)** Histogram showing the mean number of germ cell corpses detected  
1009 in wild type and *gras-1* worms. Error bars represent the SEM. \*\*\*\* $p < 0.0001$ , Mann-  
1010 Whitney U-test,  $n = 117$  and  $93$  gonads respectively. **(C)** High-resolution images of wild  
1011 type and *gras-1* late pachytene nuclei stained for ZHP-3 (green) and DAPI (blue). Yellow  
1012 dotted insets depict ZHP-3 signal in black and white for one of the nuclei in the field  
1013 showing individual foci in wild type and some ZHP-3 tracks in *gras-1*.  $n = 72$  and  $71$  nuclei  
1014 each from 15 gonads each. **(D)** Top, High-resolution representative images of diakinesis  
1015 nuclei stained for HIM-3 (magenta) and with DAPI (blue) from wild type, *gras-1* (yellow  
1016 arrow indicates a fragile connection), *ced-3*, and *gras-1;ced-3* (yellow arrows indicate  
1017 univalents in the top and interbivalent attachments in the bottom image). Each individual  
1018 DAPI-stained body is indicated with a white number. Bottom, table showing the  
1019 distribution of diakinesis nuclei per genotype that had the normal 6 bivalents or one of the  
1020 listed abnormalities. \* $p = 0.0436$  between *gras-1;ced-3* and wild type by Fisher's exact  
1021 test.

1022

1023

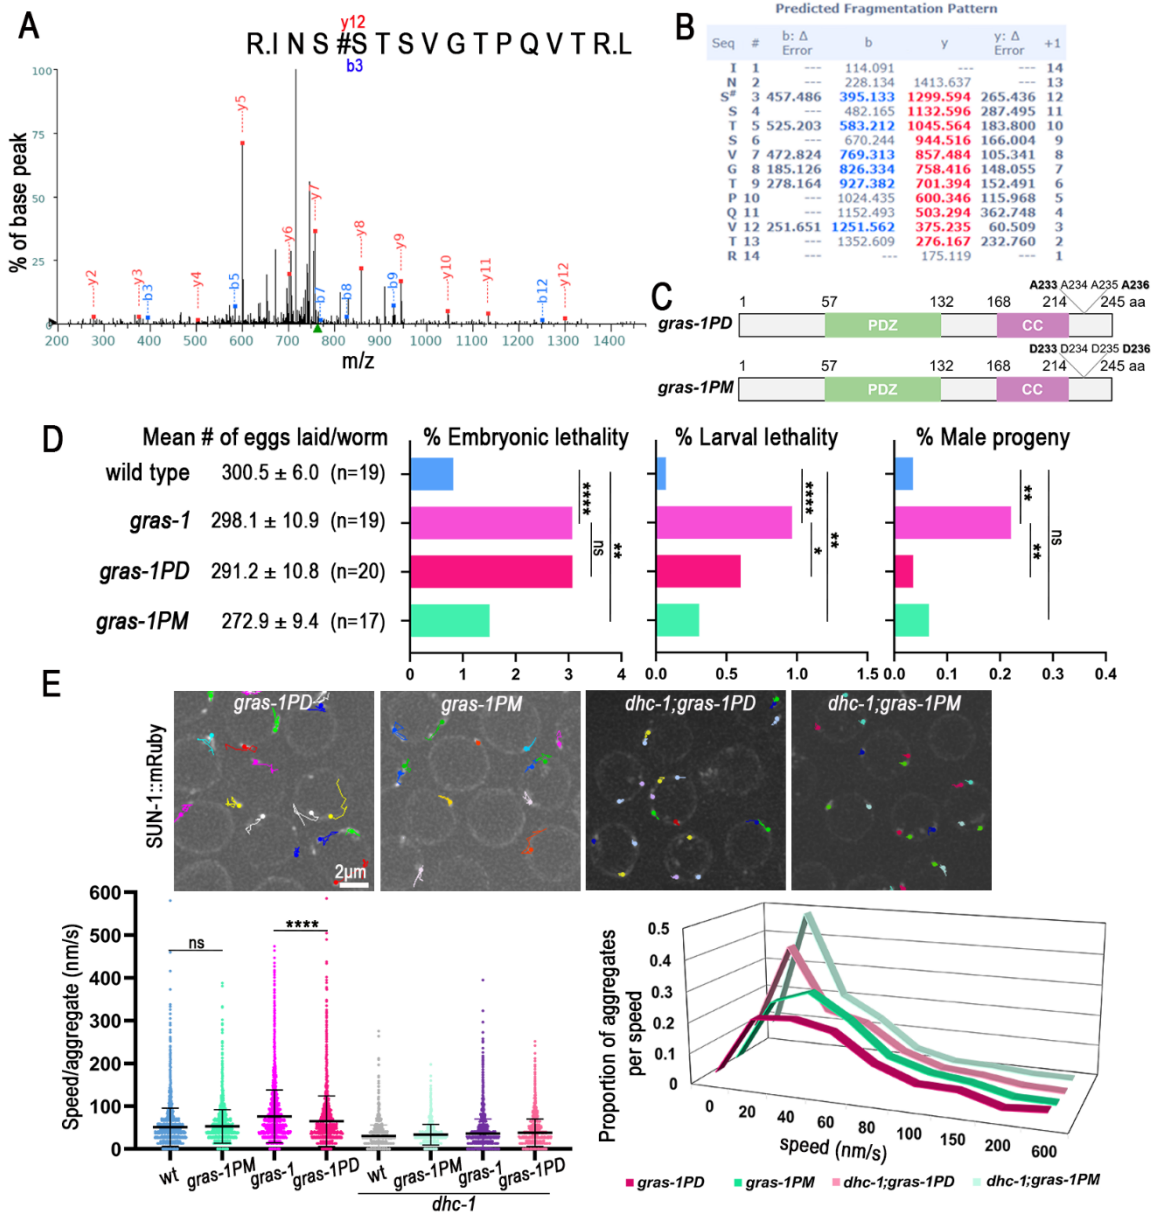

1024

1025

1026 **Fig. 5. GRAS-1 function in limiting early prophase I chromosome movement is**  
1027 **regulated by phosphorylation. (A)** Mass spectrometry fragmentation spectrum for  
1028 GRAS-1::GFP peptide INSSTSVGTPQVTRL in the range 200-1400 m/z. The annotated  
1029 spectrum shows fragment ion species matched between theoretical and measured  
1030 values. “b-ions” are generated through fragmentation of the N-terminal peptide bond, and  
1031 “y-ions” through the C-terminal. **(B)** Predicted MS fragmentation pattern and deviations  
1032 ( $\Delta$  Error). Analysis of b and y ions is consistent with the phosphorylation of the second  
1033 serine (S#) in this peptide, corresponding to S233 of the GRAS-1 protein. **(C)** Schematic  
1034 representation of the proteins encoded by the CRISPR-Cas9 engineered *gras-1PD*  
1035 (phosphodead) and *gras-1PM* (phosphomimetic) mutants. A: alanine, D: aspartic acid.  
1036 **(D)** Shown are the mean number of eggs laid (brood size)  $\pm$  SEM, percentage of  
1037 embryonic lethality, larval lethality, and males for the indicated genotypes. \*p < 0.05, \*\*p  
1038 <0.01, \*\*\*\*p < 0.0001, ns: not significant, by Fisher’s exact test. n= number of worms for  
1039 which entire progeny were analyzed. **(E)** Top, snapshot of live imaging of SUN-1::mRuby  
1040 aggregates and their travelled paths in 60s in *gras-1PD*, *gras-1PM*, *dhc-1;gras-1PD* and  
1041 *dhc-1;gras-1PM* leptotene/zygotene nuclei. Bottom, dot plot displaying the speed (nm/s)  
1042 of SUN-1::mRuby aggregates and the distribution graph of the aggregates per speed for  
1043 the indicated genotypes. Worms were grown in bacteria containing the empty-vector or  
1044 *dhc-1(RNAi)* construct. \*\*\*p<0.0001, ns: not significant by Student’s t-test, n= 325, 343,  
1045 326, 245, 244, 195, 377 and 247 aggregates per genotype as shown in figure, from 9 to  
1046 13 gonads and at least two independent biological repeats. Error bars represent the mean  
1047  $\pm$  SD.

1048



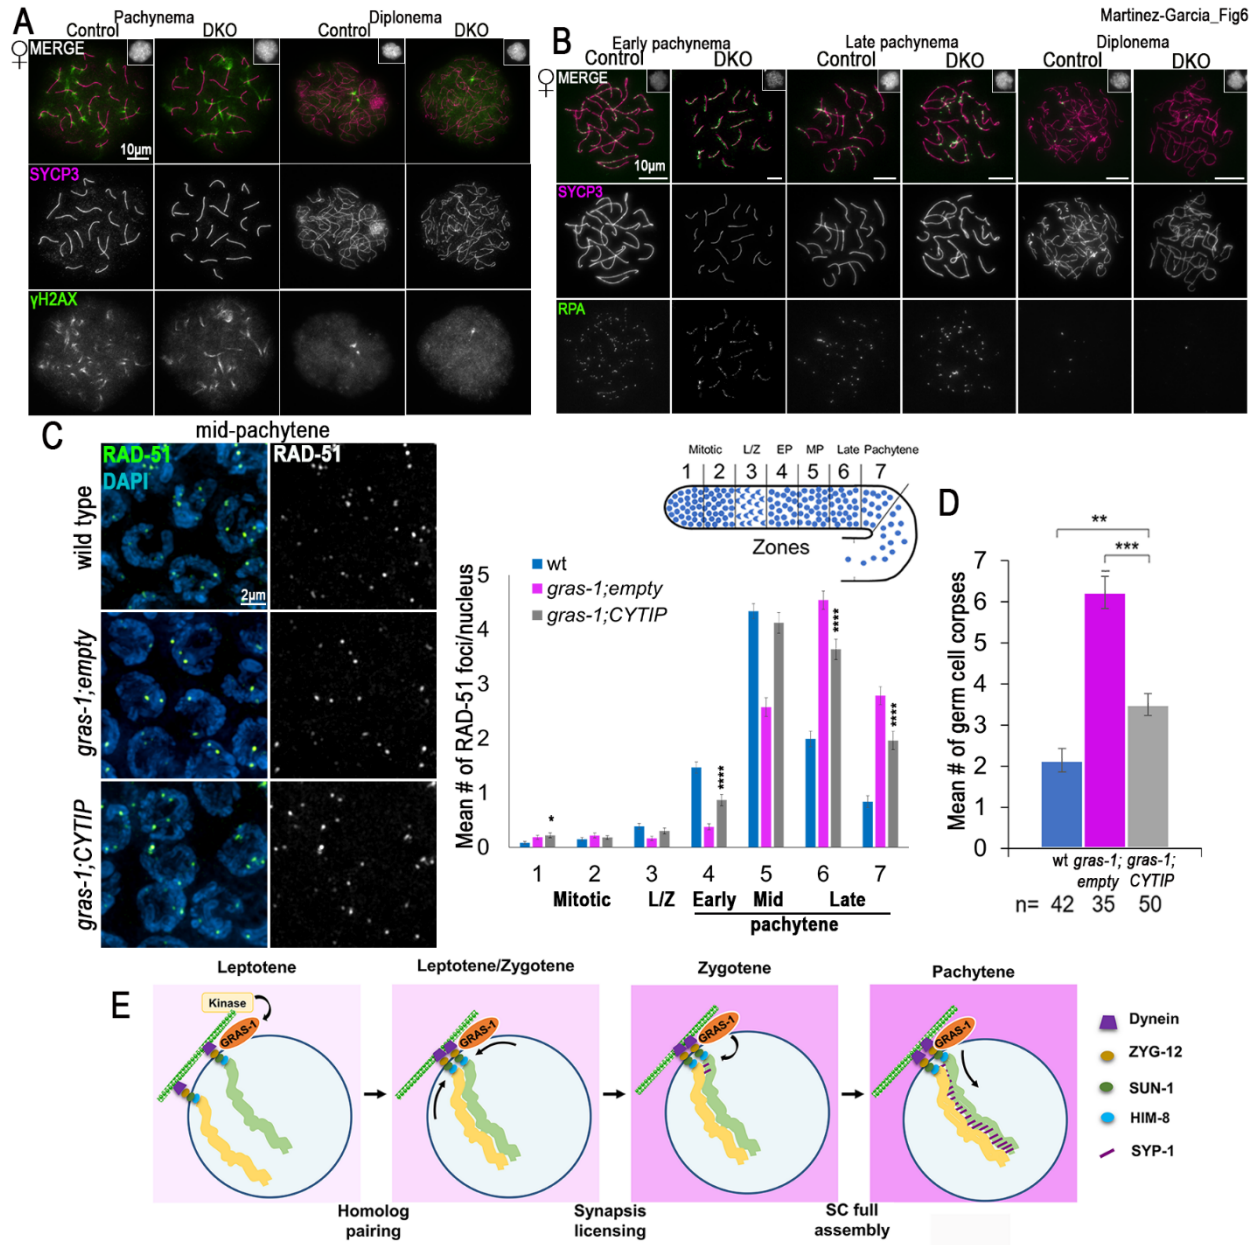

1049

1050

1051 **Fig. 6. GRAS-1 shares partial functional conservation with human CYTIP. (A)**

1052 Chromatin spreads from mid meiotic prophase (pachynema) and late meiotic prophase  
1053 (diplonema) control and *Tamalin-Cytip* DKO *Mus musculus* oocytes co-immunostained  
1054 with anti-SYCP3 (magenta) and anti- $\gamma$ -H2AX (green). Insets show normal chromatin  
1055 morphology (DAPI). n=50 cells per mouse and 3 mice per genotype. **(B)** Chromatin  
1056 spreads from early and late pachynema and diplonema, control and *Tamalin-Cytip* DKO  
1057 *Mus musculus* oocytes co-immunostained with antibodies against SYCP3 (magenta) and  
1058 RPA (green). Insets show normal chromatin morphology (DAPI). **(C)** Left, high-resolution  
1059 images of mid-pachytene nuclei from wild type, *gras-1;empty* and *gras-1;CYTIP*  
1060 germlines stained with anti-RAD-51 (green) and DAPI (blue). Right, Histogram showing  
1061 the mean number of RAD-51 foci/nucleus scored along the germlines for the indicated  
1062 genotypes. 5-6 gonads were scored per genotype in two independent biological  
1063 replicates. Error bars represent the SEM. \* $p < 0.05$ , \*\*\*\* $p < 0.0001$  by the Mann-Whitney U-  
1064 test. **(D)** Histogram showing the mean number of germ cell corpses of wild type (*gras-*  
1065 *1;empty* and *gras-1;CYTIP* worms. Error bars represent the SEM. \*\* $p < 0.01$ , \*\*\* $p < 0.001$ ,  
1066 Mann-Whitney U-test, n= 42, 35 and 50 gonads, respectively. **(E)** A model for the role of  
1067 GRAS-1 during *C. elegans* meiosis. We propose that GRAS-1 bridges the cytoskeleton,  
1068 the LINC complexes, and chromosomes to limit chromosome movement in a  
1069 phosphorylation-dependent manner and license synapsis during early prophase I. A  
1070 single pair of homologous chromosomes (yellow and green) is shown for simplicity within  
1071 a nucleus delimited by the nuclear envelope (dark blue line) and attached to the LINC  
1072 complex and a single microtubule (green/white checkered bar).

1073
